# Supplementary material for: The perinecrotic niche of glioblastoma drives tumor-associated macrophage polarization and immunosuppression via podoplanin-mediated CLEC5A activation
Source: JCI journal article supplement (doi:10.1172/jci199228), 2026-06-02
Supplement: sd2 [file 2]

# Supplementary Figure 1

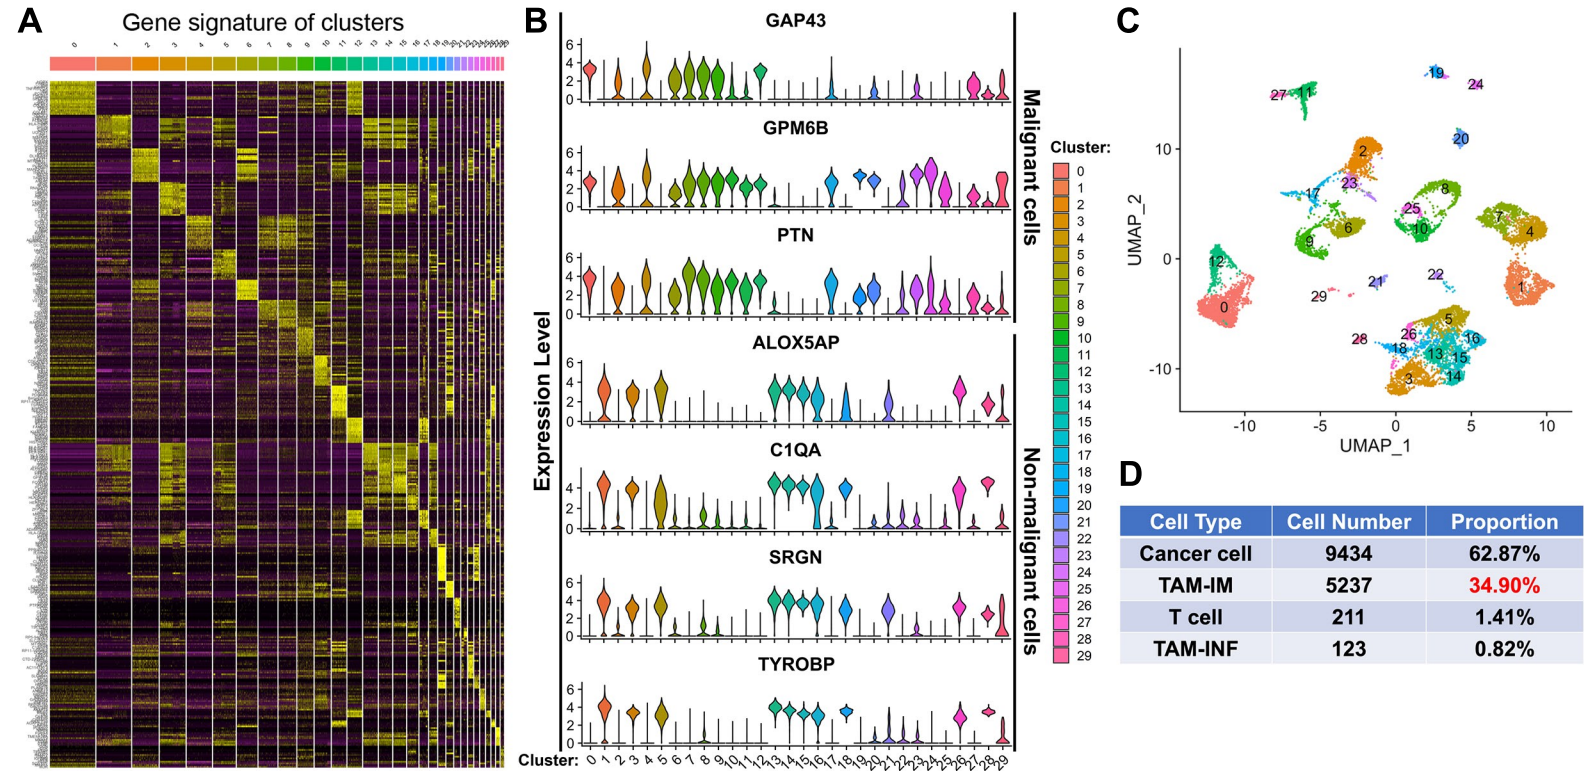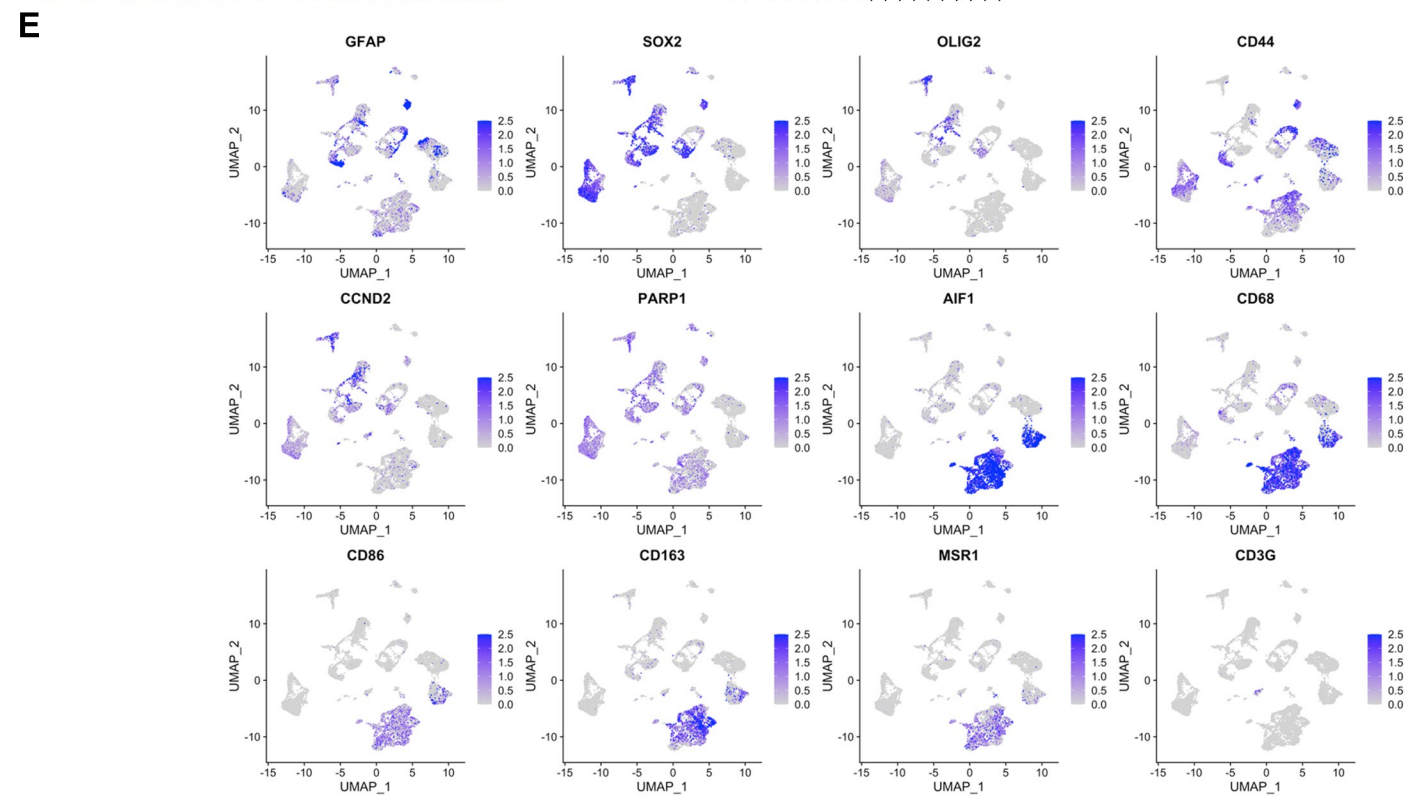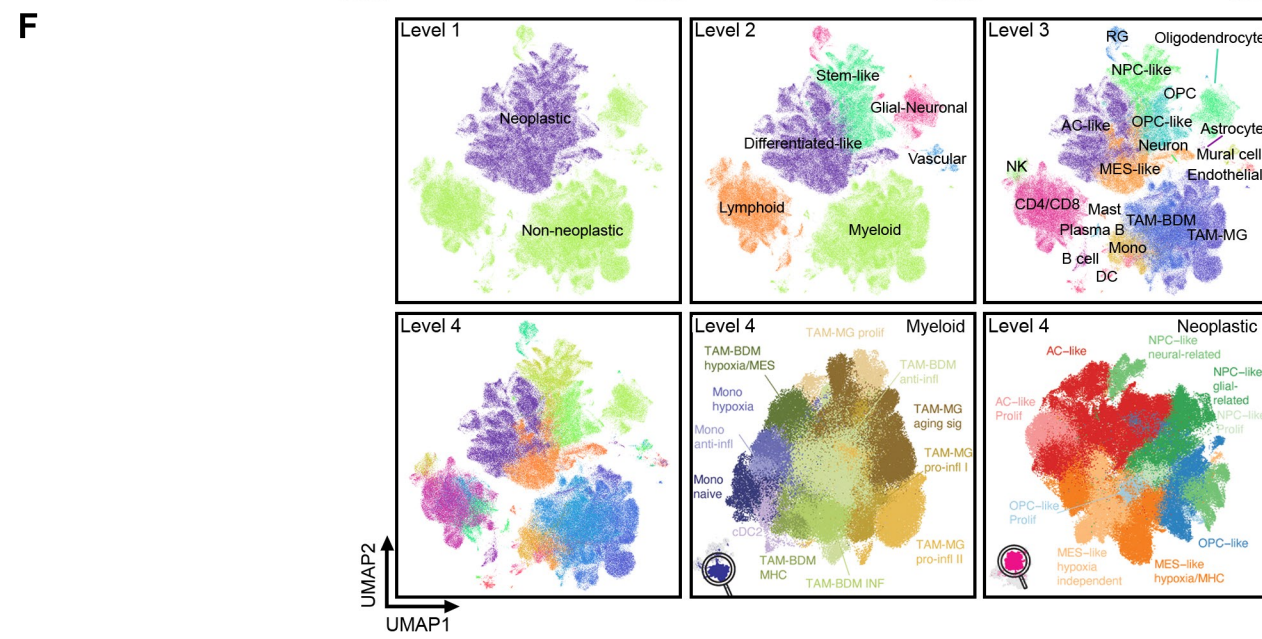

# Supplementary Figure 2

## A Survival Analysis in CGGA\_GBM\_RNAseq Dataset

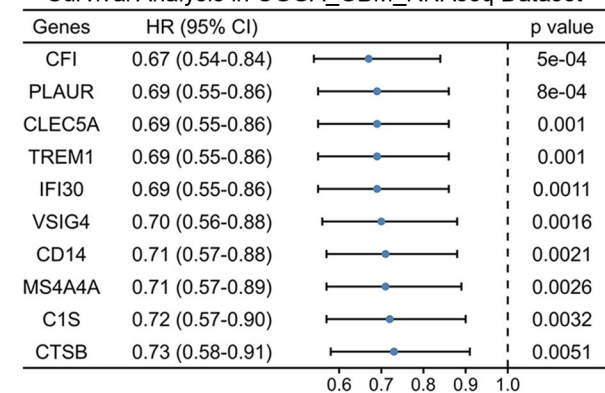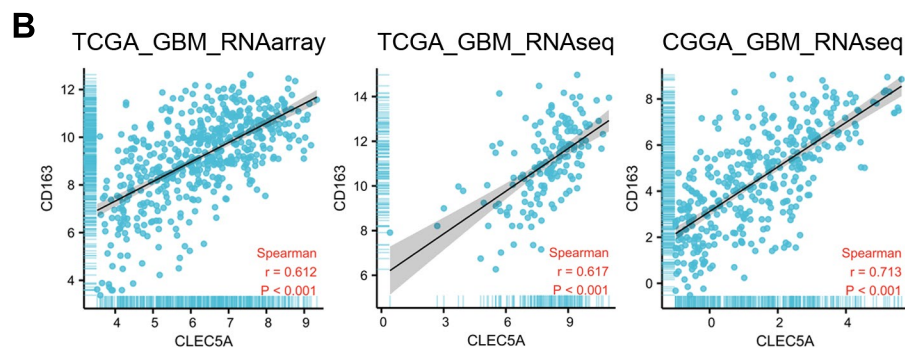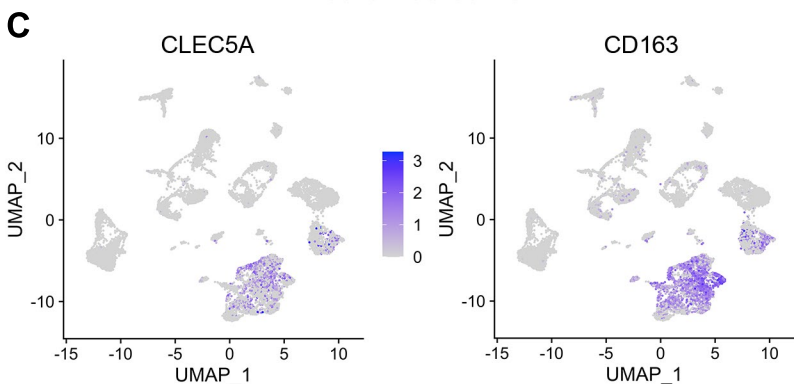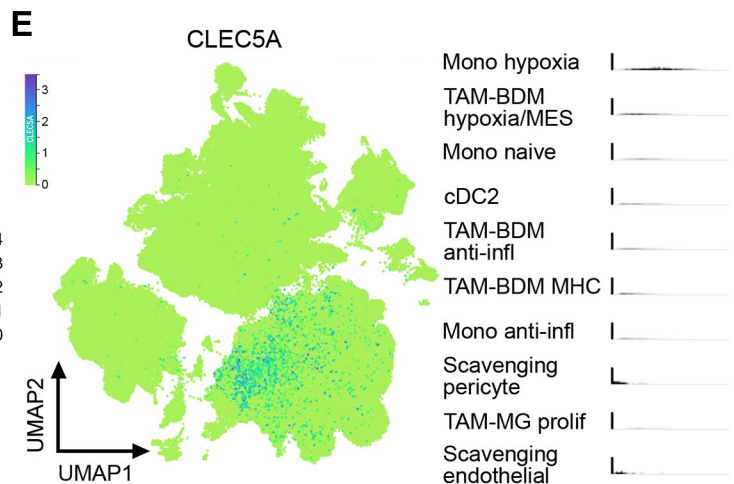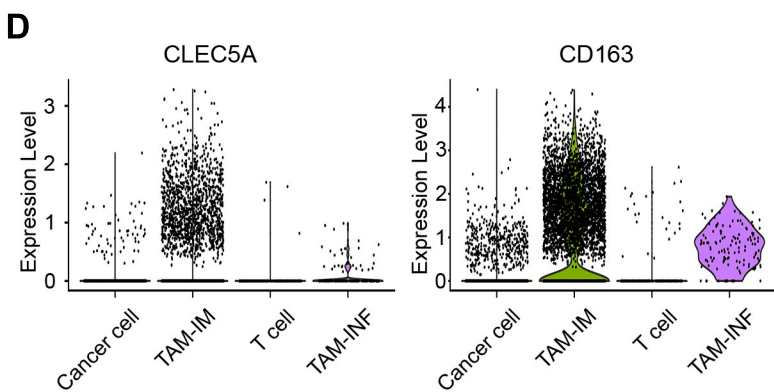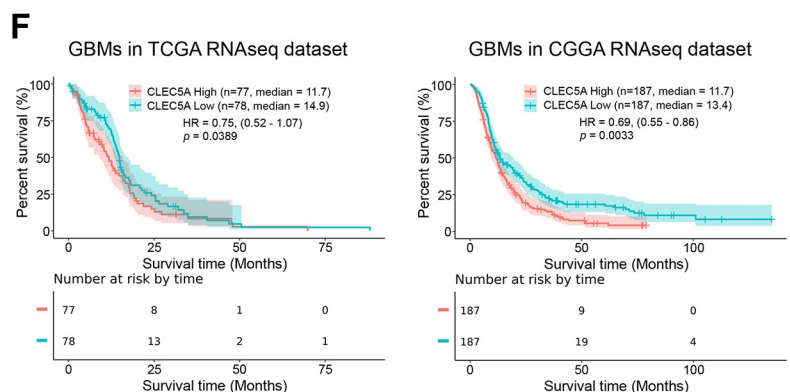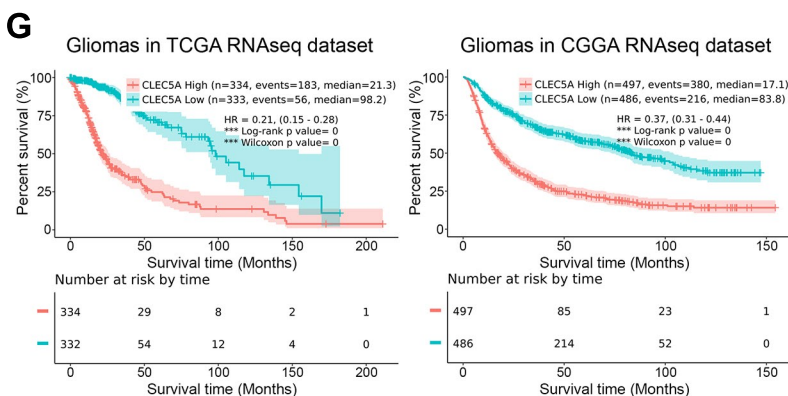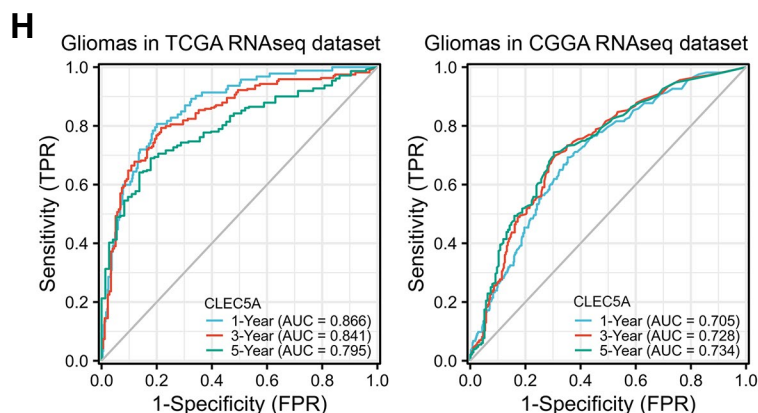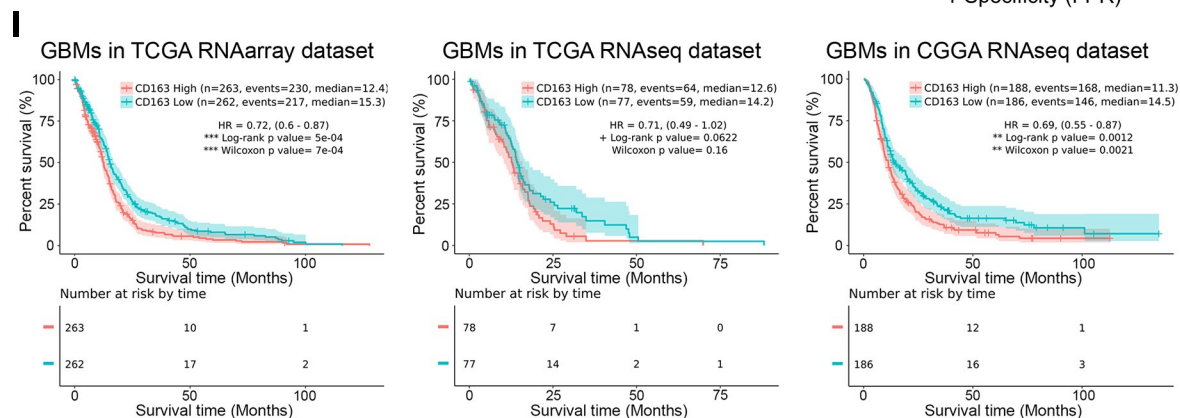

Supplementary Figure 3

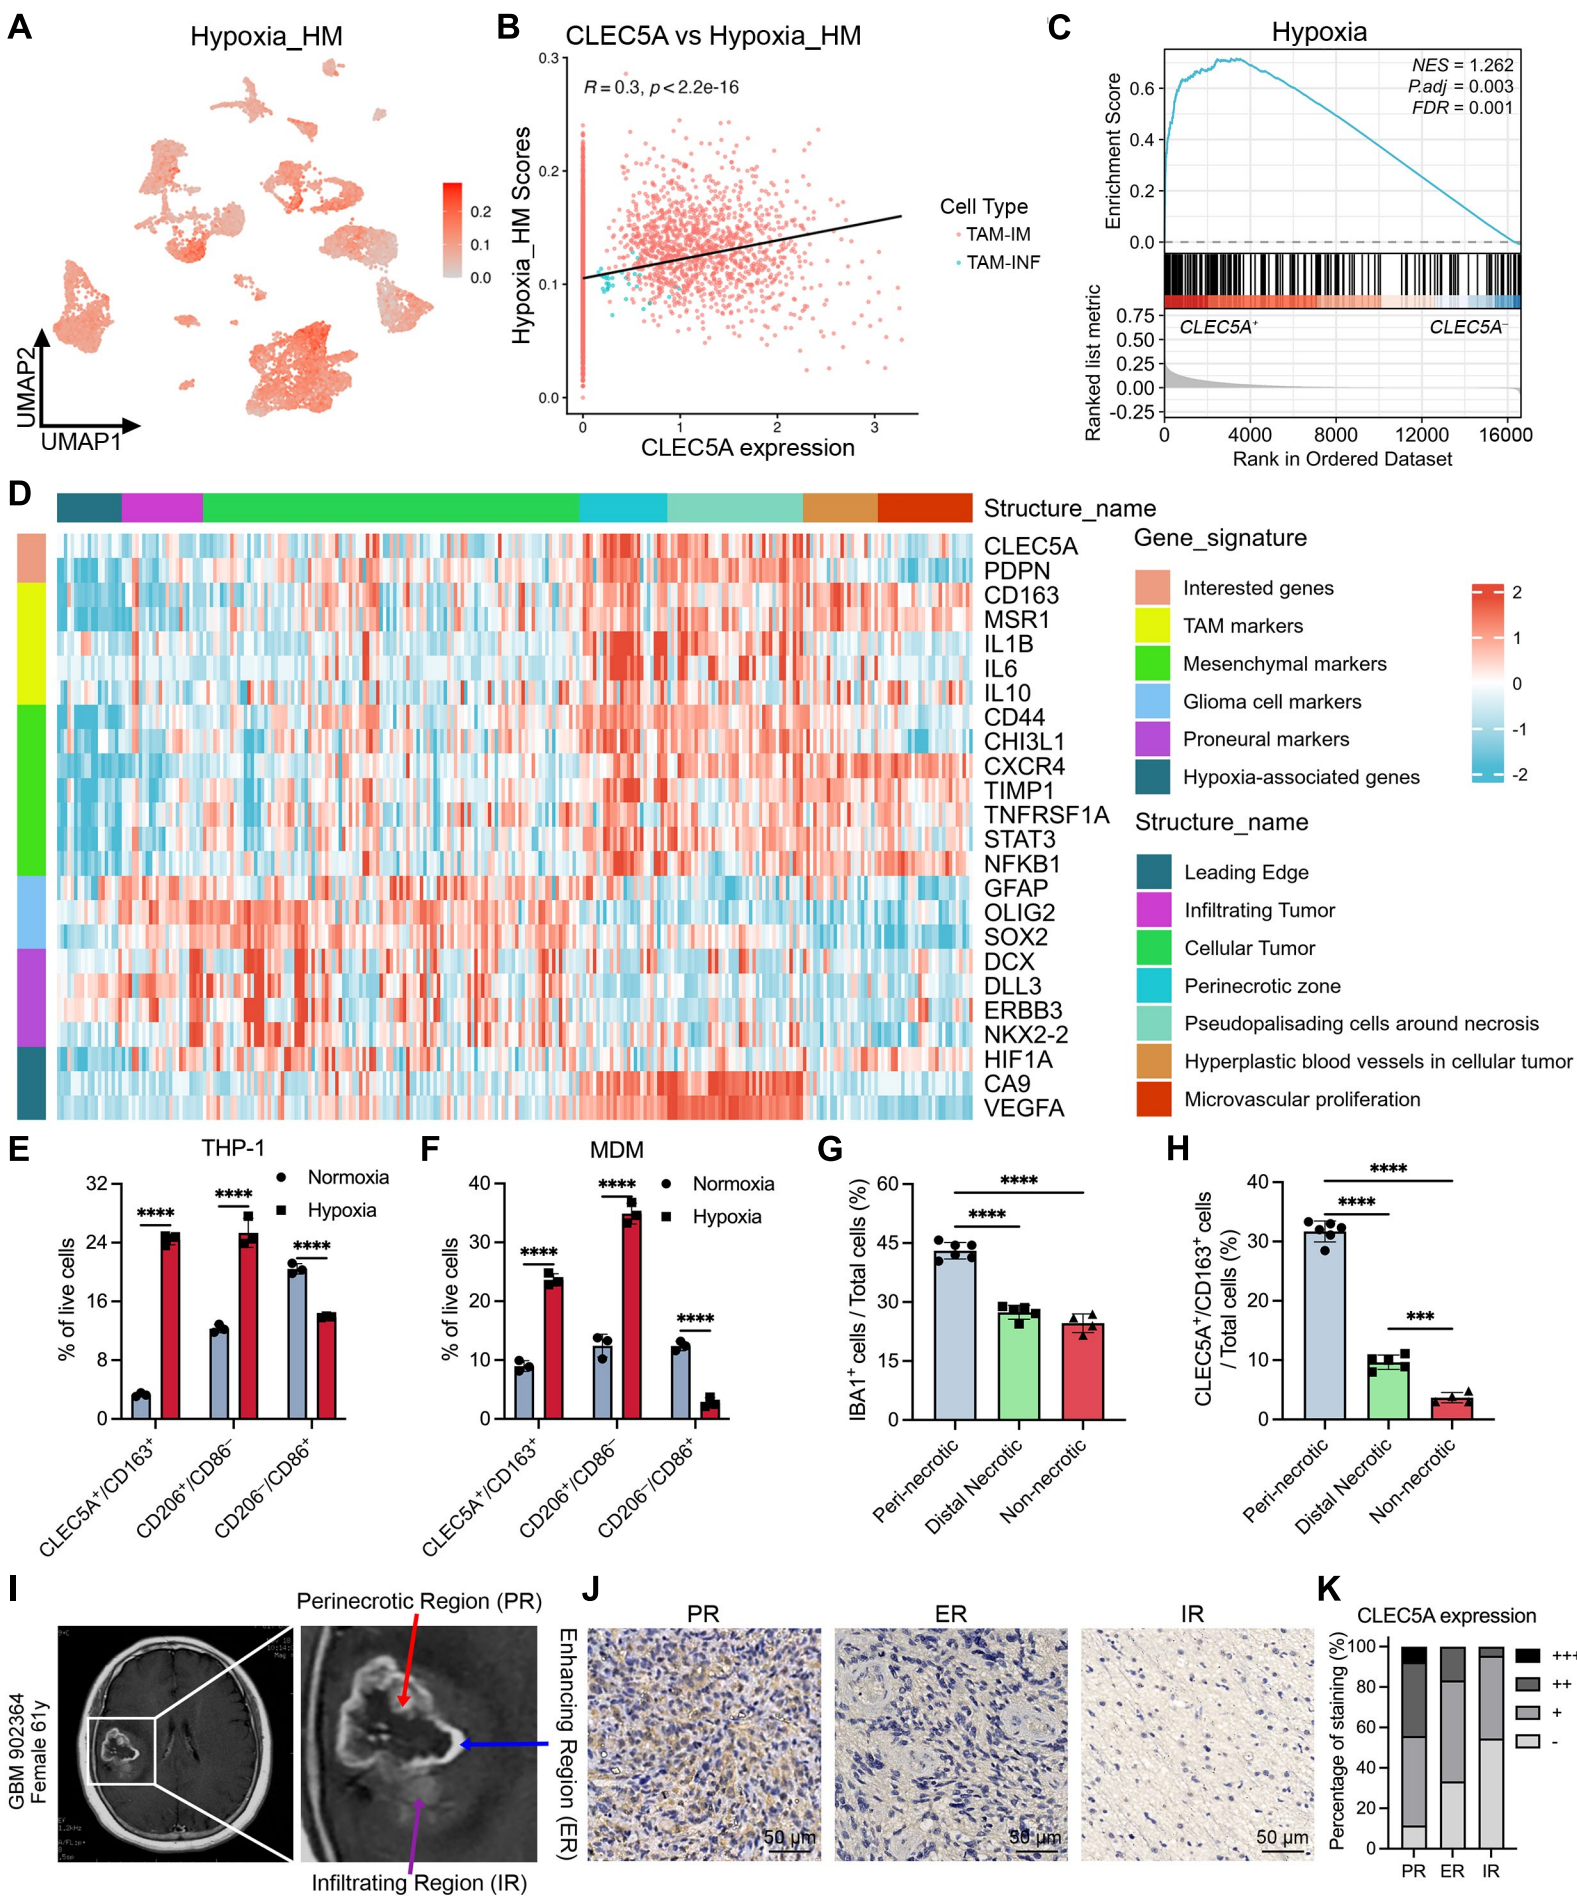

# Supplementary Figure 4

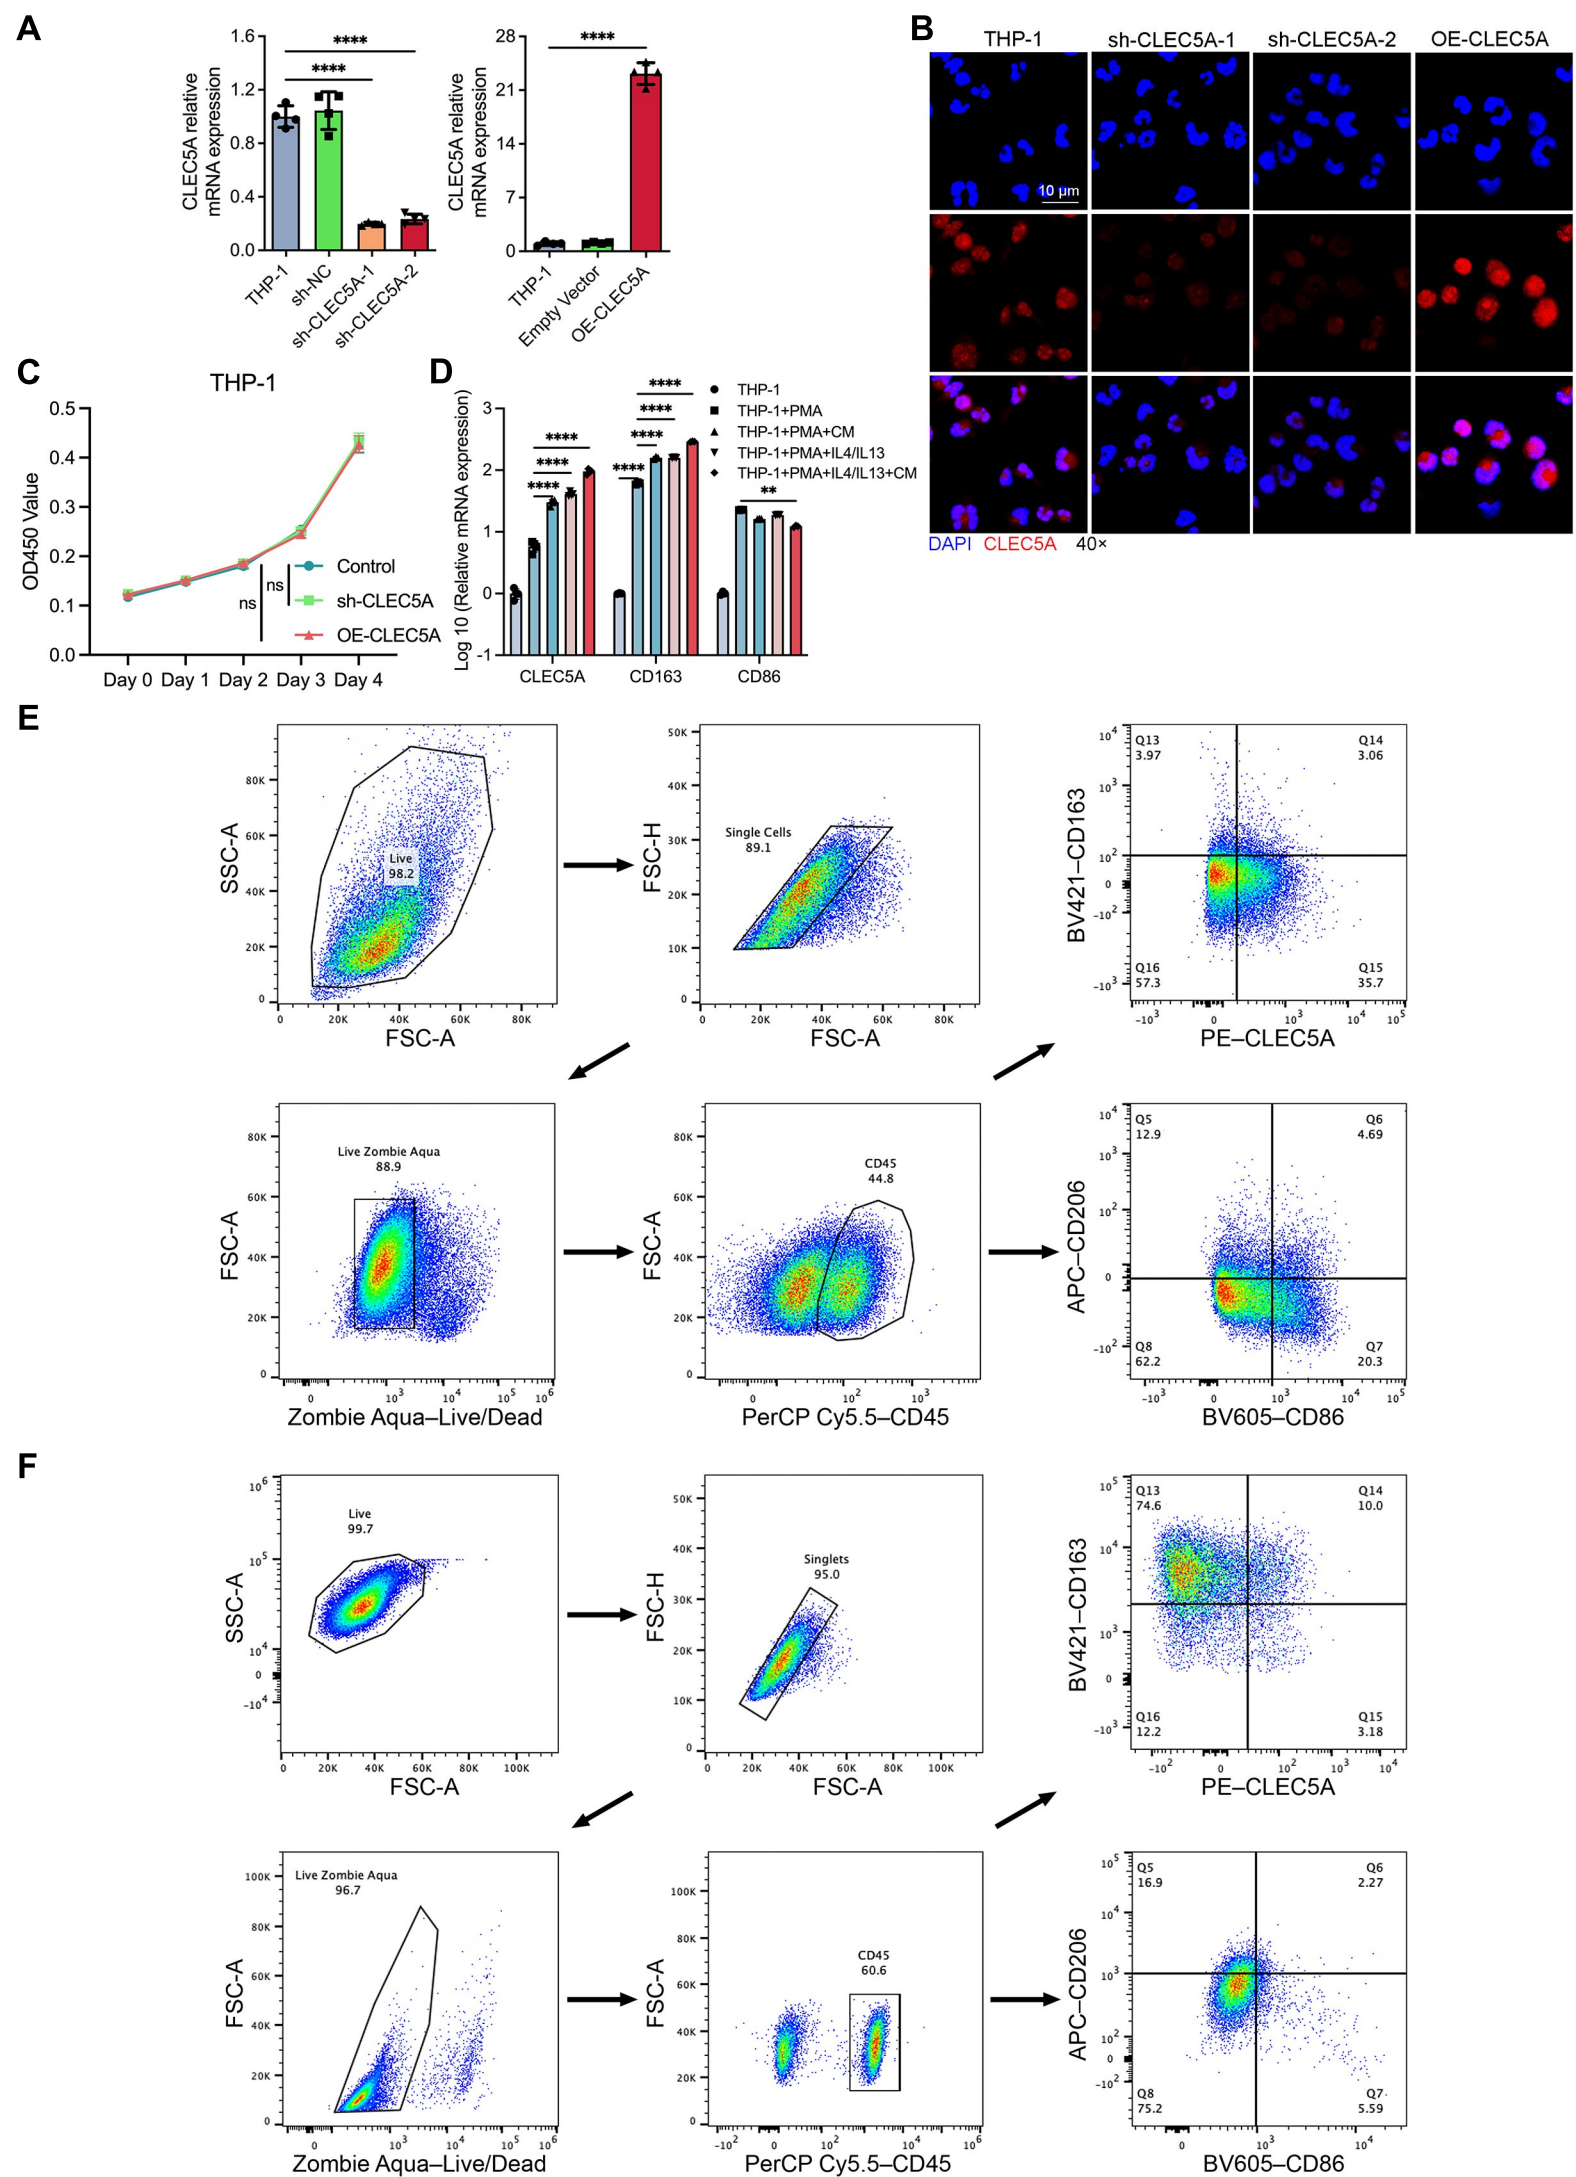

# Supplementary Figure 5

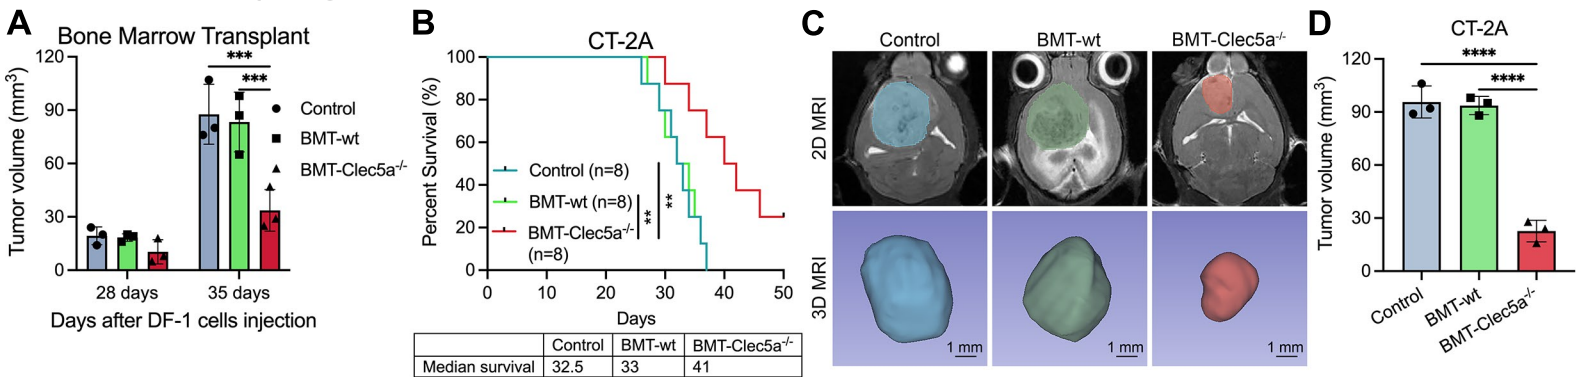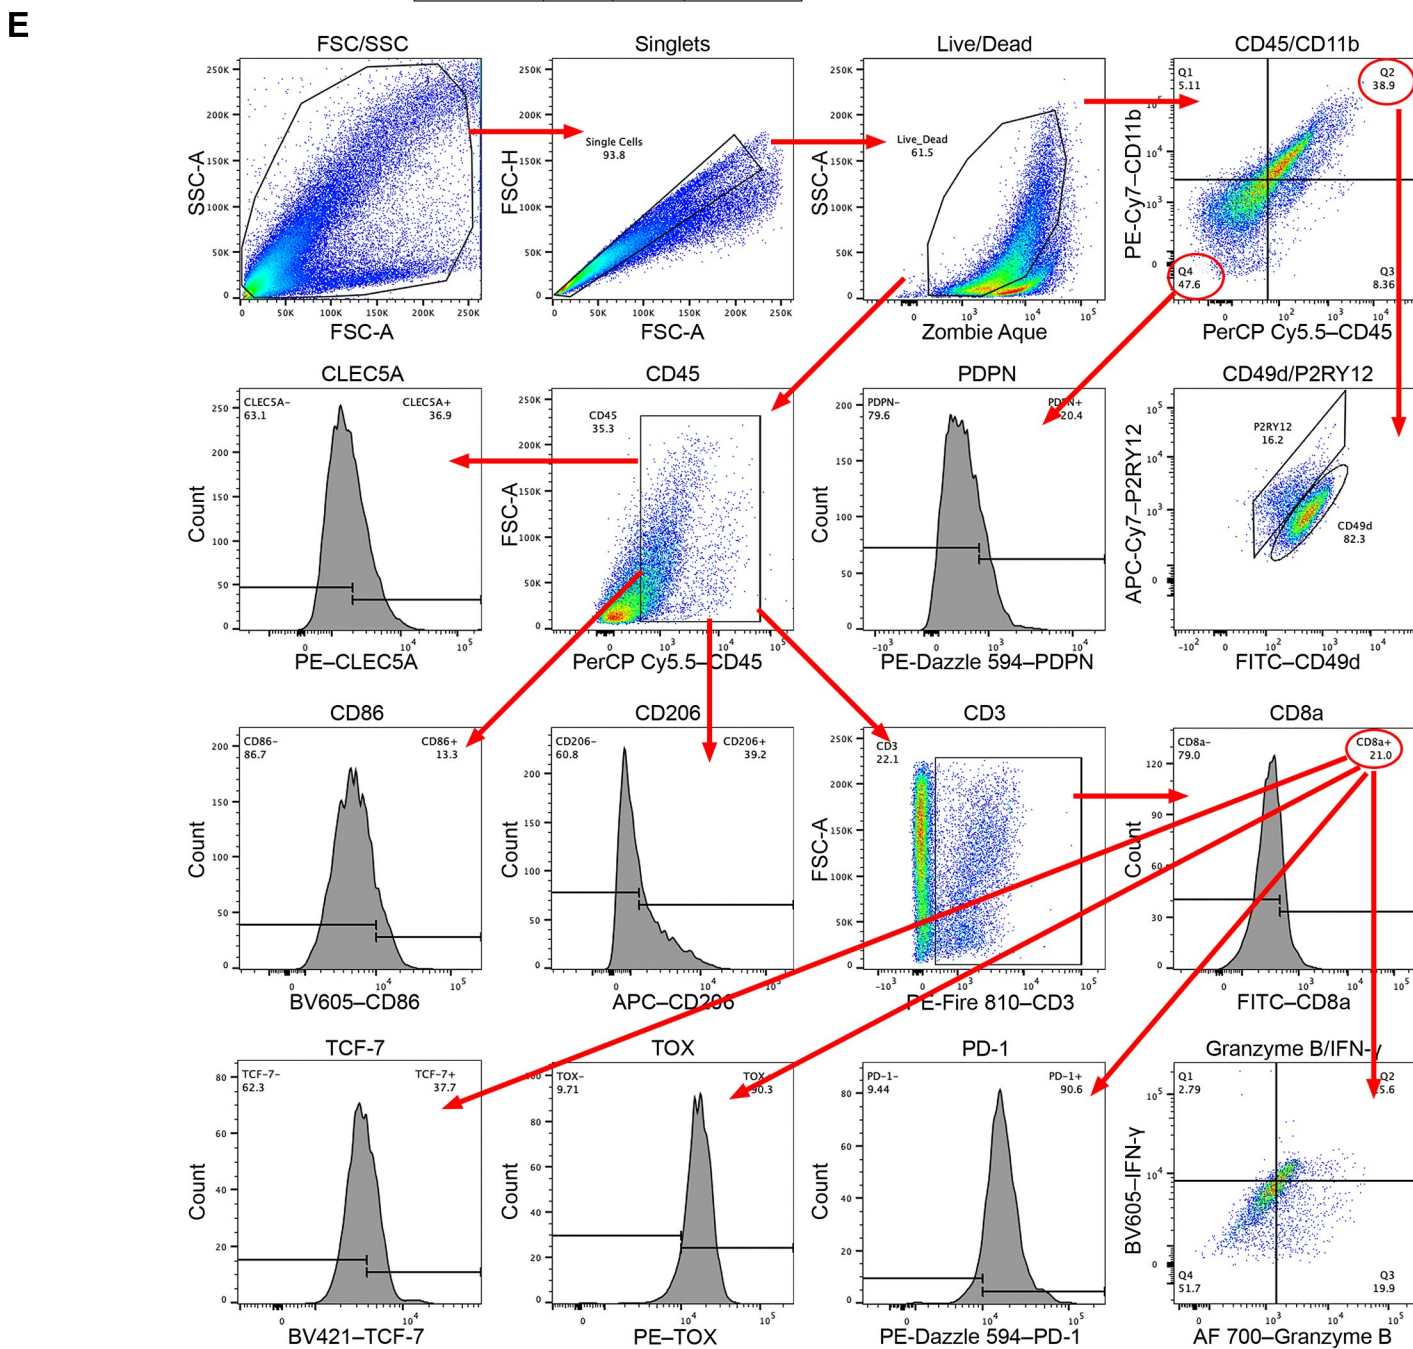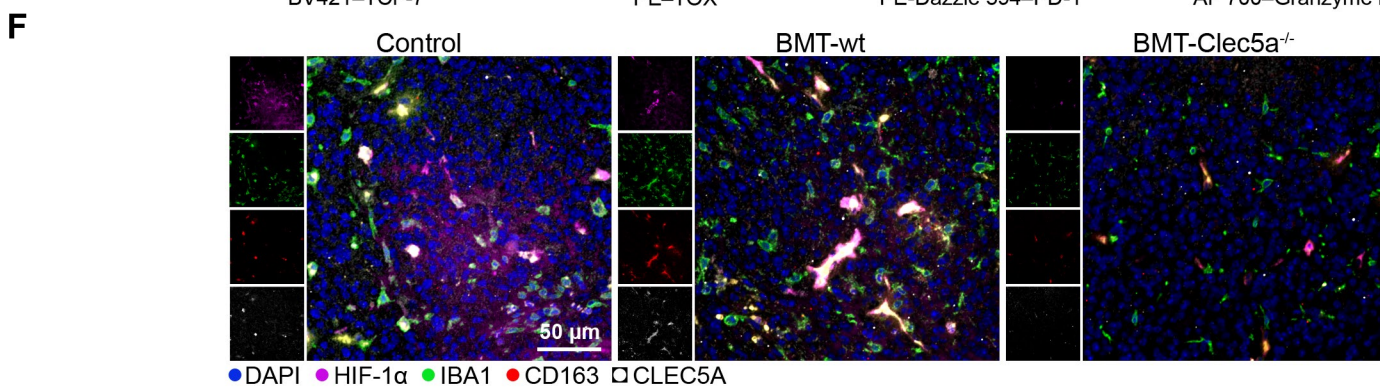

# Supplementary Figure 6

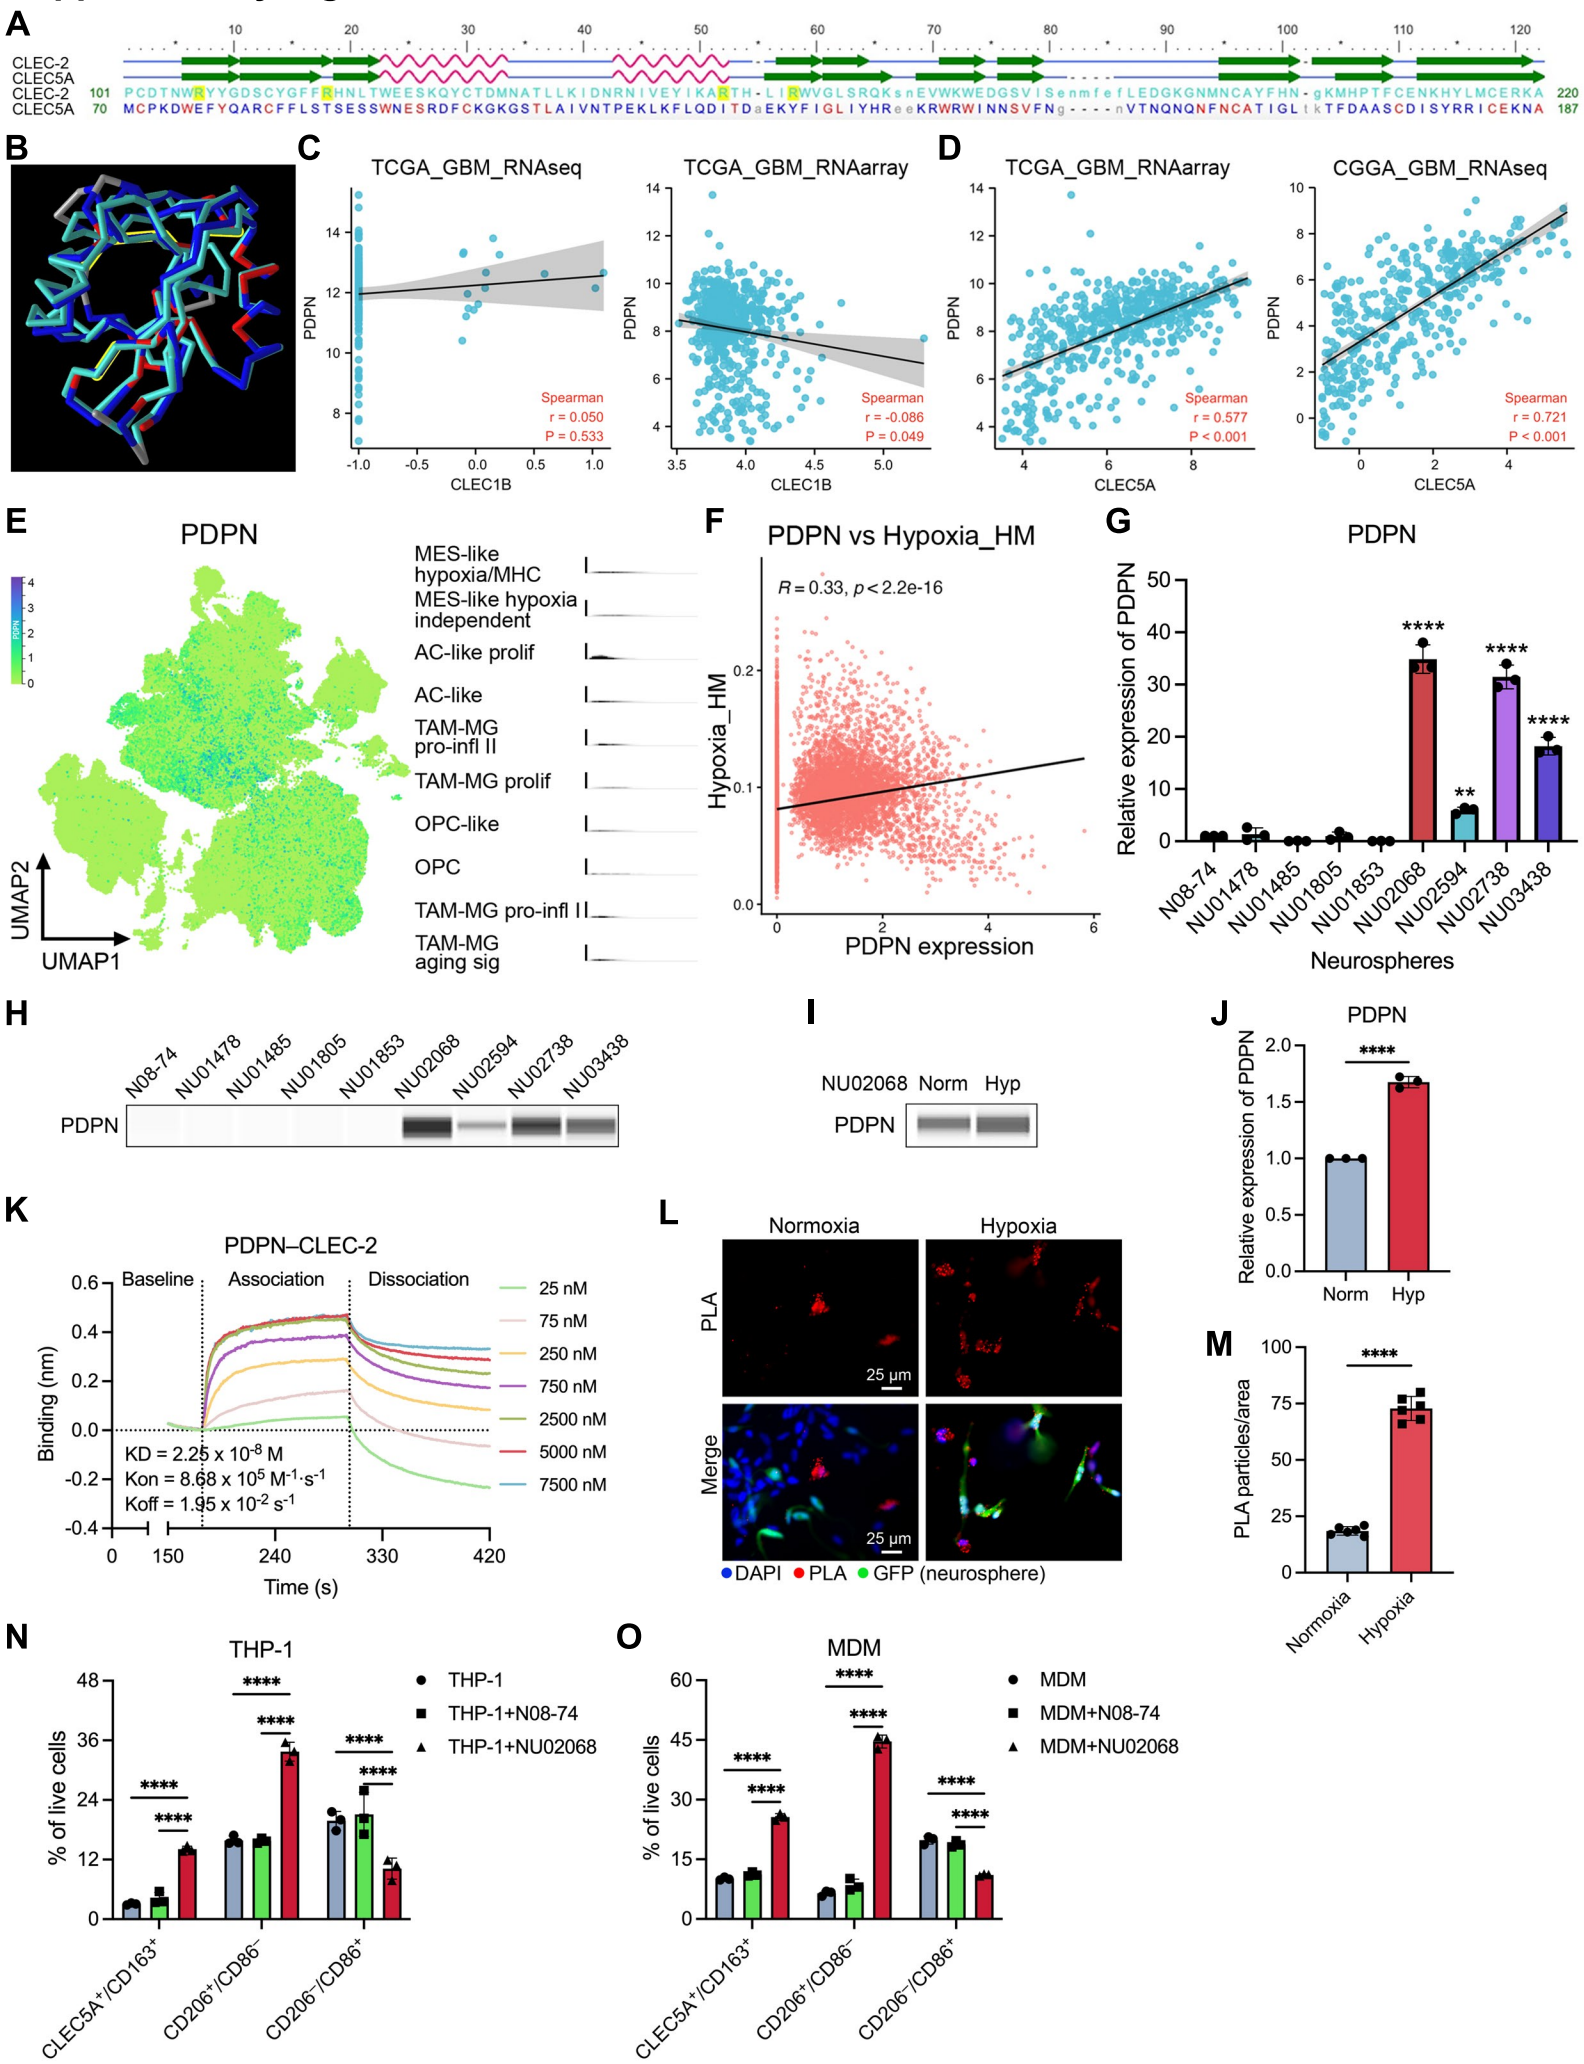

# Supplementary Figure 7

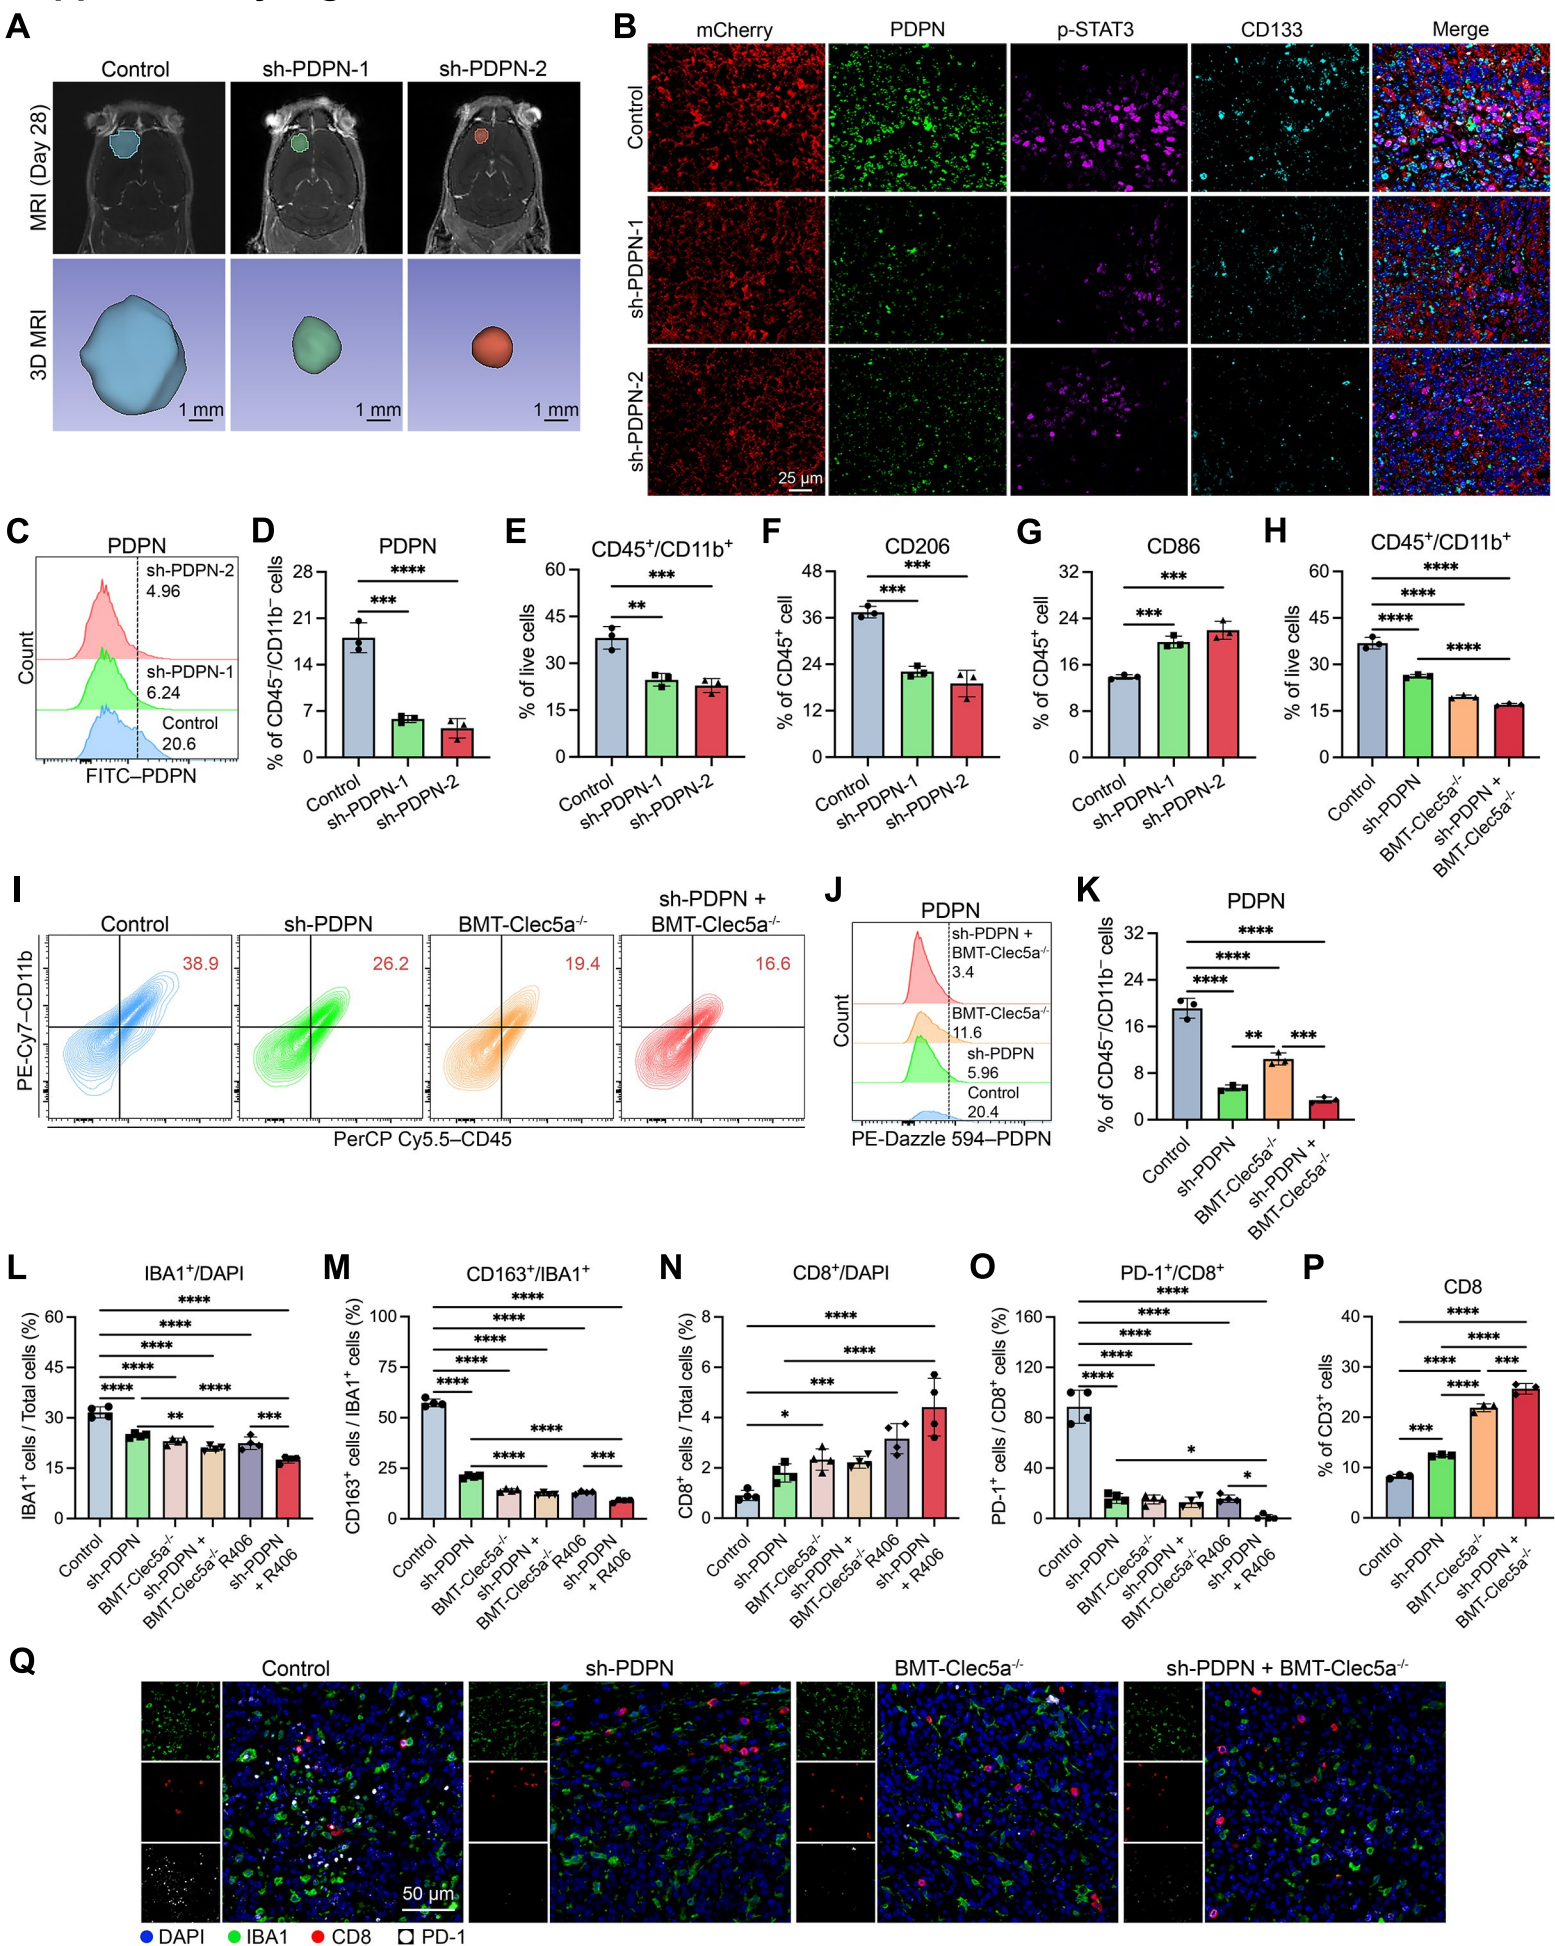

# Supplementary Figure 8

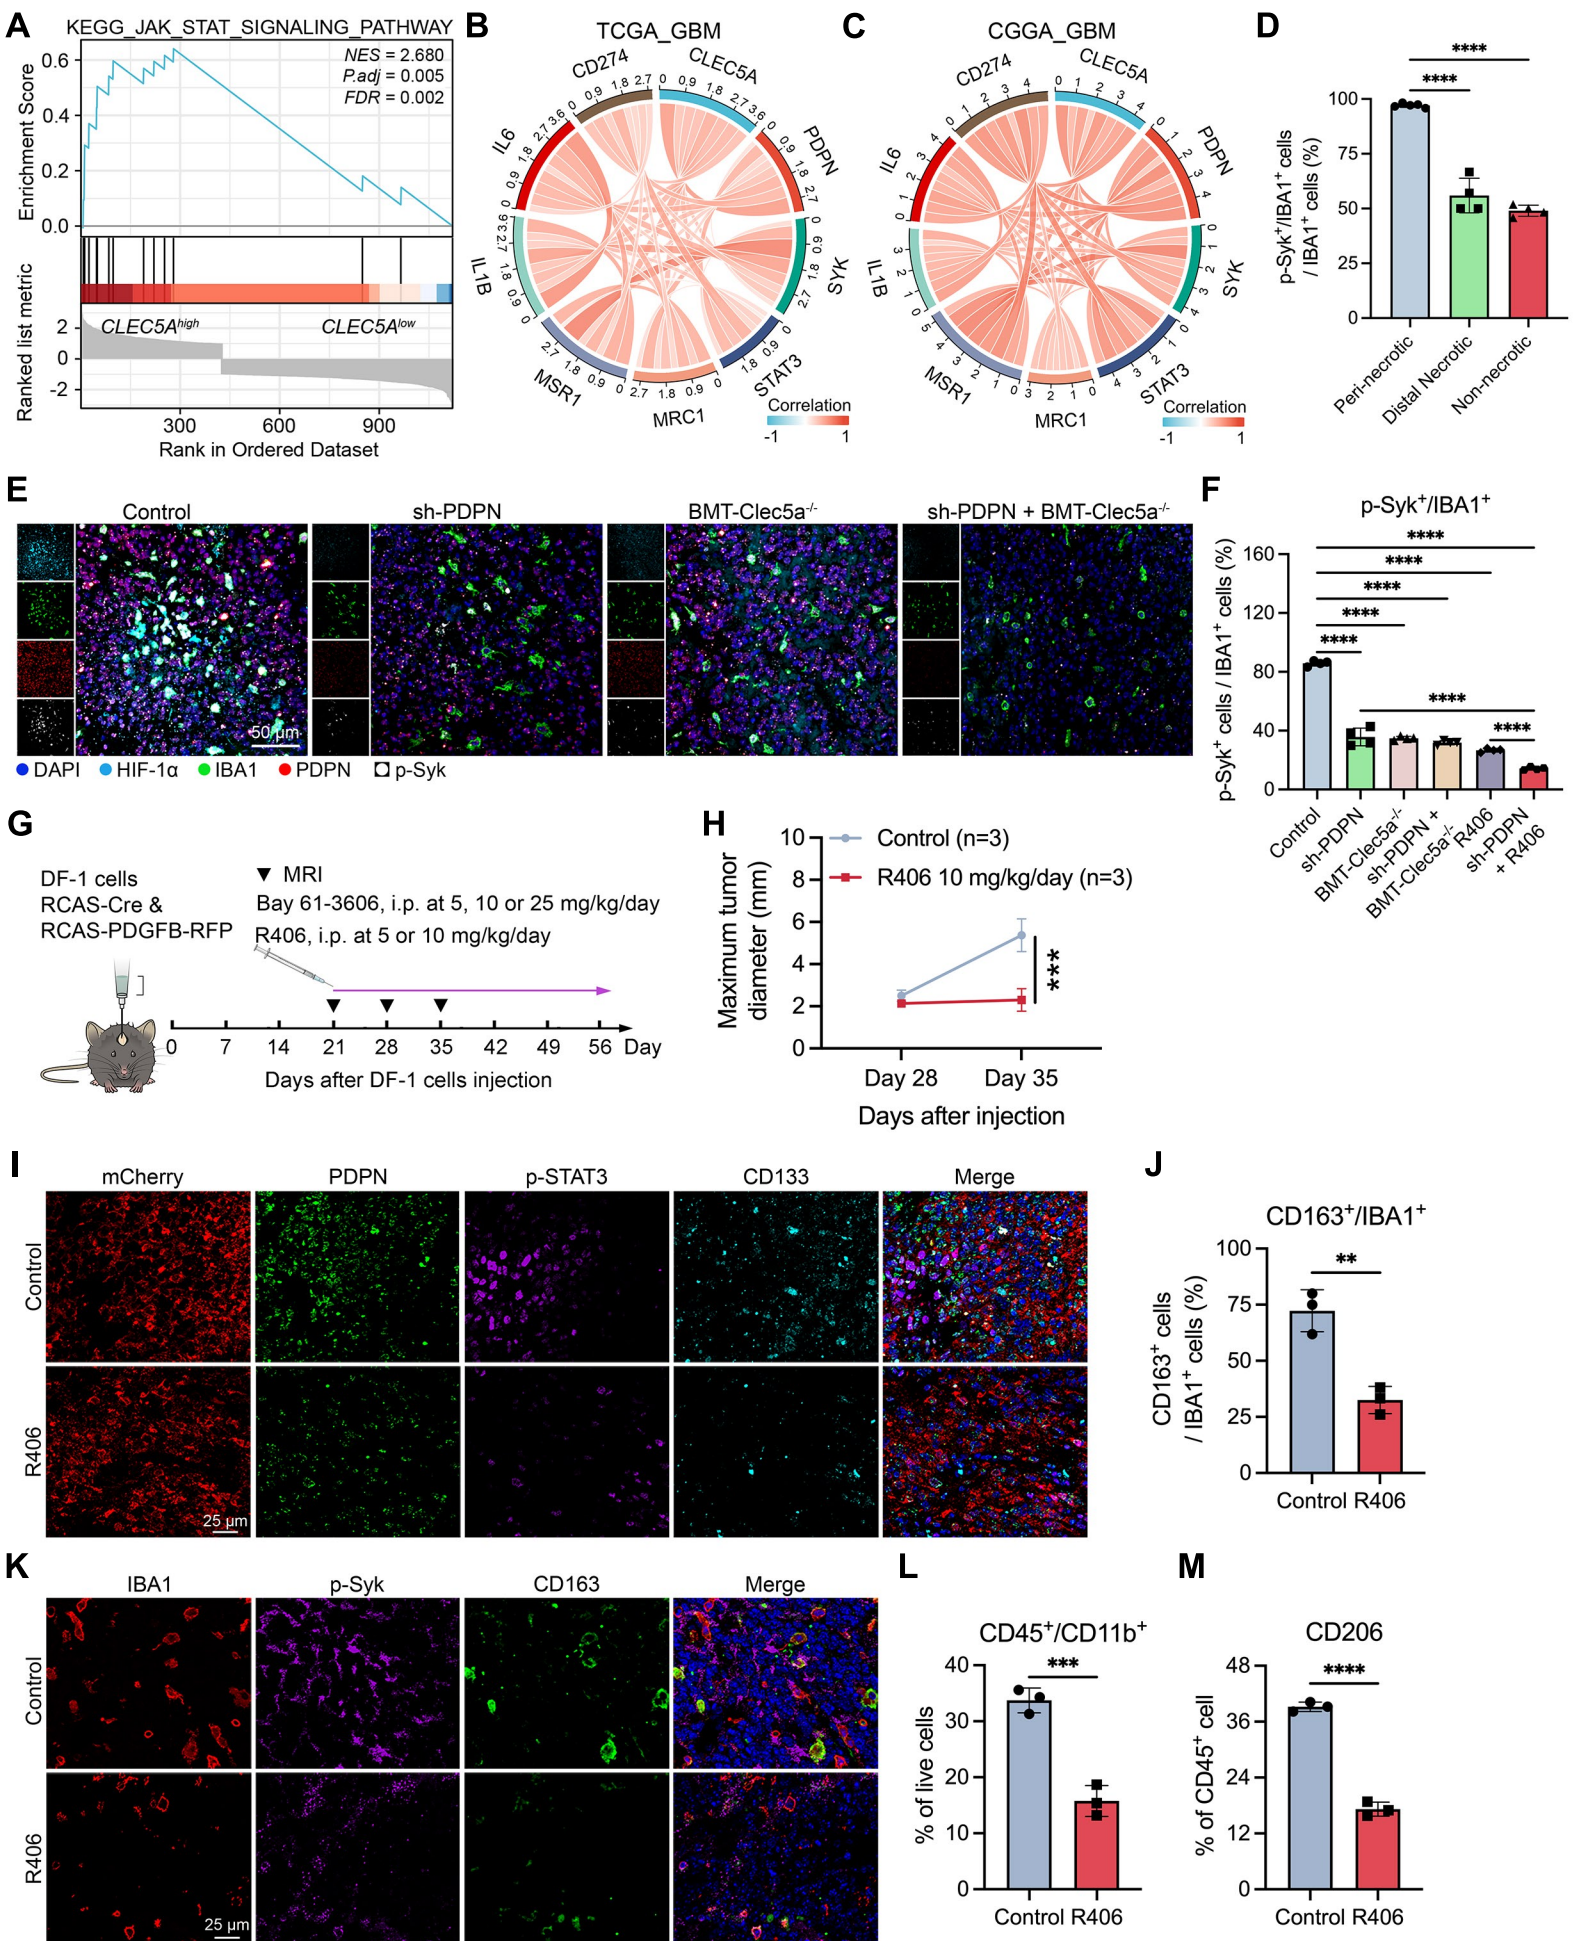

# Supplementary Figure 9

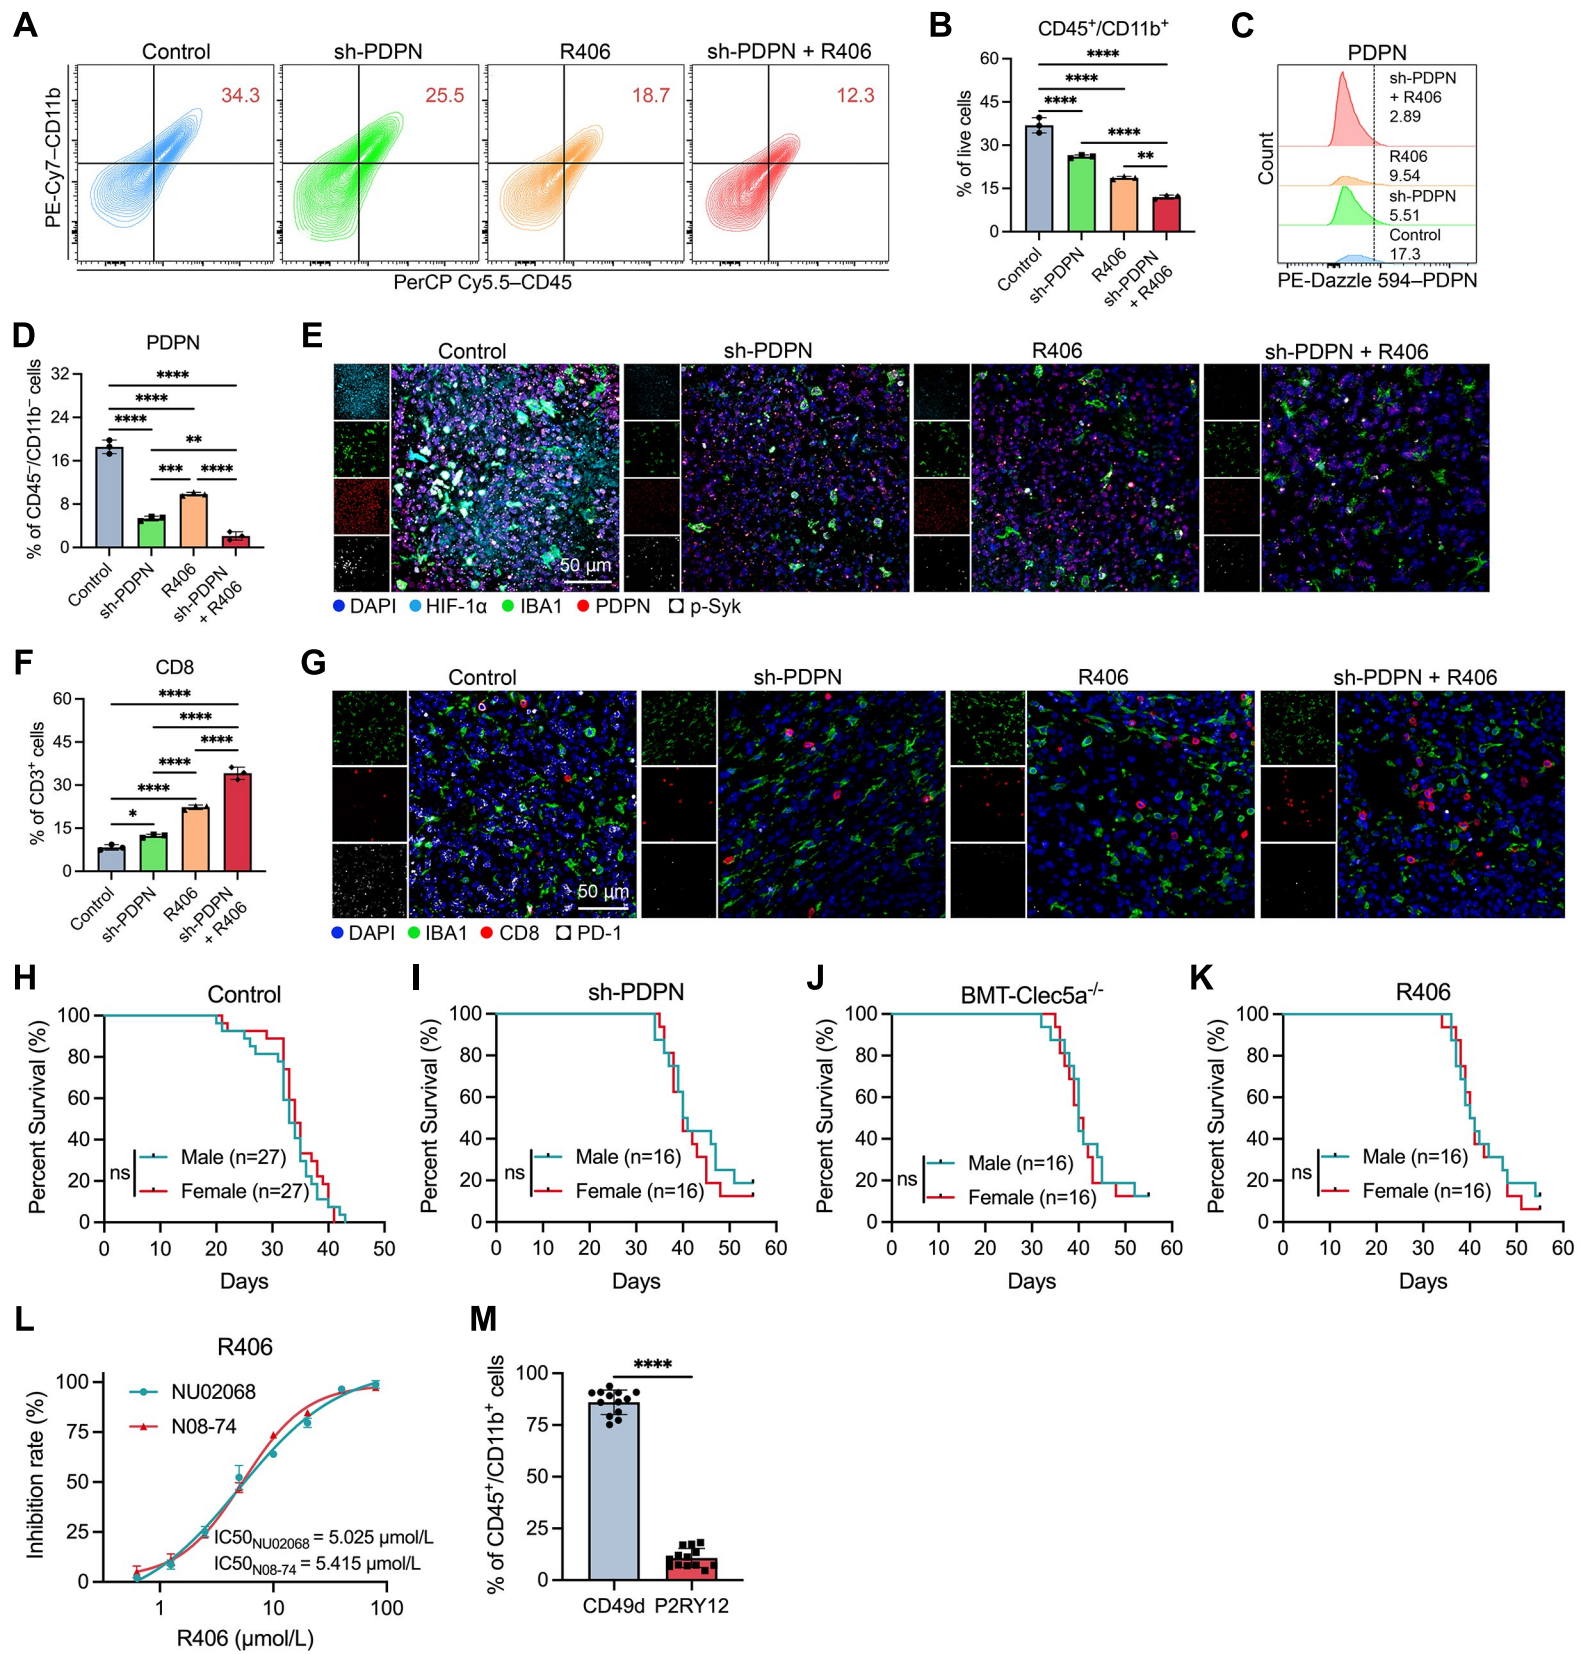

## Supplementary Figure Legends

### Supplementary Figure 1. scRNA-seq analysis

**A.** Heatmap clustering of GBM scRNA-seq data, using top 20 genes expressed for each cluster. **B.** Violin plot showing malignant cell markers (*GAP43*, *GPM6B* and *PTN*) and non-malignant cell markers (*ALOX5AP*, *C1QA*, *SRGN* and *TYROBP*) in specific clusters. **C.** scRNA-seq *Seurat* and UMAP analysis clustered samples into 30 distinct gene expression profiles. **D.** Table displaying scRNA-seq cellular subset numbers and proportions. **E.** Gene expression markers identify cell type signatures. **F.** UMAP projections annotated at increasing levels of resolution (Levels 1-4), illustrating separation of neoplastic and non-neoplastic compartments (Level 1), major lineage classes (Level 2), canonical immune and stromal subsets (Level 3), and refined cellular states including TAM subtypes and neoplastic programs (Level 4).

### Supplementary Figure 2. *CLEC5A* is highly correlated with *CD163* and survival curve analysis based on *CLEC5A* expression in gliomas

**A.** Forest plot validates the top 10 common genes closely associated with survival of GBMs, with *CLEC5A* ranking third in CGGA RNA-seq dataset. **B.** Spearman correlation coefficient shows correlation between *CD163* and *CLEC5A* in IDH-wildtype GBM in TCGA RNA microarray, TCGA RNA-seq and CGGA RNA-seq datasets. **C-D.** Feature plot (C) and violin plot (D) showing *CLEC5A* and *CD163* expression in specific cellular subsets within scRNA-seq data. **E.** Feature plot and distribution analysis of *CLEC5A* expression across cell populations. *CLEC5A* is enriched in hypoxia-associated myeloid states, including Mono hypoxia and TAM-BDM hypoxia/MES subsets. **F.** Kapan-Meier overall survival for GBM patients with high vs low *CLEC5A* expression in TCGA RNA-seq and CGGA RNA-seq datasets. **G.** Kapan-Meier survival curves for glioma patients with high vs low *CLEC5A* expression in TCGA RNA-seq and CGGA RNA-seq datasets. **H.** Time-dependent ROC curves display the predictive capacity of *CLEC5A* expression on 1-year, 3-year and 5-year glioma patient survival in TCGA and CGGA databases. **I.** Kapan-Meier overall survival for GBM patients with high vs low *CD163* expression in TCGA RNA microarray, TCGA RNA-seq and CGGA RNA-seq datasets. (\*\* $p < 0.01$ , \*\*\* $p < 0.001$ )

### Supplementary Figure 3. *CLEC5A* is enriched in hypoxic peri-necrotic niche of GBM

**A.** Feature plot of hypoxia gene set scores (MSigDB Hallmark Hypoxia; Hypoxia\_HM) computed using the “Ucell” algorithm and projected onto the UMAP. **B.** Correlation analysis between

CLEC5A expression and hypoxia gene set scores in TAM-IM and TAM-INF subsets. **C.** GSEA analysis shows that *CLEC5A*<sup>+</sup> TAMs-IM are highly enriched in the “hypoxia” gene signature. **D.** Ivy GAP data demonstrating the micro-regional expression of *CLEC5A*, *PDPN*, TAM-IM markers (*CD163*, *MSR1*, *IL6*, *IL10*), mesenchymal markers (*CD44*, *CHI3L1*, *CXCR4*, *TIMP1*, *TNFRSF1A*, *STAT3*, *NFKB1*), cancer cells markers (*GFAP*, *OLIG2*, *SOX2*), and proneural markers (*OLIG2*, *SOX2*, *DCX*, *DLL3*, *ERBB3*, *NKX2-2*) in 270 samples from 44 GBMs with 7 anatomical subregions, including the leading edge (LE), infiltrating tumor (IT), cellular tumor (CT), microvascular proliferation (MVP), hyperplastic blood vessels (HBV), peri-necrotic zone (PZ), and pseudopalisading cells (PC). **E-F.** Quantification of *CLEC5A*<sup>+</sup>/*CD163*<sup>+</sup>, *CD206*<sup>+</sup>/*CD86*<sup>-</sup>, and *CD206*<sup>-</sup>/*CD86*<sup>+</sup> THP-1 populations (E) and MDM populations (F) under normoxia versus hypoxia (two-way ANOVA, Šídák’s multiple-comparisons test). **G-H.** Quantification of IBA1<sup>+</sup> cells as a percentage of total cells (G), and *CLEC5A*<sup>+</sup>/*CD163*<sup>+</sup> cells as a percentage of total cells (H) across peri-necrotic, distal necrotic, and non-necrotic regions (one-way ANOVA, Tukey’s multiple-comparisons test). **I.** MRI imaging was used to identify tumor subregions: the peri-necrotic region (PR) adjacent to the necrotic core, the enhancing region (ER) surrounding the contrast-enhancing tumor, and the infiltrating region (IR) representing the non-enhancing infiltrative tumor. **J.** TMA representative images displaying *CLEC5A* in multiple regions from one GBM patient sample (Scale bar, 50 μm). **K.** Total *CLEC5A* IHC score in three multiregional of GBM samples (a total score of 0-1 as negative (-), 2-3 as weakly positive (+), 4-5 as moderately positive (++) and 6-7 as strongly positive (+++)). (\*\*\*) $p < 0.001$ , (\*\*\*\*) $p < 0.0001$

#### **Supplementary Figure 4. Validation of *CLEC5A* knockdown and overexpression efficiency in THP-1 cells and flow cytometry gating strategy**

**A.** qPCR showing lentiviral transfection efficiency for knockdown (sh-*CLEC5A*-1, sh-*CLEC5A*-2) and overexpression (OE-*CLEC5A*) vectors along with the resultant *CLEC5A* mRNA expression in THP-1 cells (one-way ANOVA, Dunnett’s multiple-comparisons test). **B.** IF staining displaying lentiviral transfection efficiency for knockdown (sh-*CLEC5A*-1, sh-*CLEC5A*-2) and overexpression (OE-*CLEC5A*) vectors (Scale bar, 10 μm). **C.** Cell proliferation of THP-1 cells with control, *CLEC5A* knockdown (sh-*CLEC5A*), or *CLEC5A* overexpression (OE-*CLEC5A*) measured by CCK-8 assay over 4 days. OD450 values are shown at indicated time points. **D.** *CLEC5A*, *CD163* and *CD86* mRNA expression levels in THP-1 cells treated with PMA, IL-4, IL-13 and/or glioma CM analyzed using qPCR (two-way ANOVA, Tukey’s multiple-comparisons

test). **E-F.** Flow cytometry gating strategy used for TAM phenotyping in THP-1 cells (E) and primary human PBMC-derived MDMs (F). Sequential gating included FSC/SSC selection, singlet discrimination, live/dead gating, and CD45<sup>+</sup> cell identification prior to analysis of CLEC5A and TAM polarization markers. (<sup>ns</sup> $p > 0.05$ ,  $*p < 0.05$ ,  $**p < 0.01$ ,  $***p < 0.001$ ,  $****p < 0.0001$ )

### **Supplementary Figure 5. CLEC5A deletion in TAMs suppresses TME immunosuppression**

**A.** Histogram showing tumor volume of tumor-bearing mice in control, BMT-wt and BMT-Clec5a<sup>-/-</sup> groups at 28 and 35 days following DF-1 cells injection (two-way ANOVA, Tukey's multiple-comparisons test). **B.** Kaplan-Meier survival analysis of mice bearing orthotopic CT-2A tumors in Control, BMT-wt, and BMT-Clec5a<sup>-/-</sup> groups (n = 8 per group). Median survival is indicated. **C.** Representative 2D MRI images (top) and corresponding 3D tumor reconstructions (bottom) from each group at 32 days post-injection. Tumor boundaries are outlined (Scale bars, 1 mm). **D.** Quantification of tumor volume based on MRI-derived 3D reconstruction across groups (one-way ANOVA, Tukey's multiple-comparisons test). **E.** Flow cytometry gating strategy for myeloid and T cell phenotyping in mouse brain tumors. Sequential gating strategy used for flow cytometric analysis of dissociated mouse brain tumor tissues. Cells were first gated by FSC/SSC to exclude debris, followed by singlet discrimination and live/dead exclusion. CD45<sup>+</sup>/CD11b<sup>+</sup> myeloid cells were identified and further subdivided into CD49d<sup>+</sup> bone marrow-derived macrophages and P2RY12<sup>+</sup> microglia. PDPN<sup>+</sup> cells were assessed within CD45<sup>-</sup>/CD11b<sup>-</sup> cells. CLEC5A and TAM polarization markers CD206 and CD86 were analyzed within CD45<sup>+</sup> cells. Within the CD45<sup>+</sup>/CD3<sup>+</sup> lymphoid compartment, CD8<sup>+</sup> T cells were further characterized for activated cytotoxic markers Granzyme B and IFN- $\gamma$ , and exhaustion markers, including PD-1, TOX (terminal exhausted) and TCF-7 (precursor). Representative plots are shown for each gating step, with percentages indicating gated populations. **F.** IF staining of HIF-1 $\alpha$ , IBA1, CD163 and CLEC5A in control, BMT-wt and BMT-Clec5a<sup>-/-</sup> mice gliomas (Scale bar, 50  $\mu$ m). ( $*p < 0.05$ ,  $**p < 0.01$ ,  $***p < 0.001$ ,  $****p < 0.0001$ )

### **Supplementary Figure 6. PDPN is associated with CLEC5A and triggers TAM polarization**

**A-B.** Comparison of domains, amino acid sequence and 3-dimensional protein structures of CLEC5A and CLEC-2. **C-D.** Spearman correlation coefficient analysis for *PDPN* expression and *CLEC1B* (*CLEC-2*) (C) as well as *CLEC5A* (D) in TCGA and CGGA GBM datasets. **E.** Feature plot and distribution analysis of PDPN expression across cell populations. PDPN is enriched in

neoplastic cell states, particularly MES-like hypoxia/MHC and MES-like hypoxia-independent programs. **F.** Correlation analysis between PDPN expression and hypoxia gene set scores in cancer cells. **G-H.** The protein expression level of PDPN in different human primary neurospheres (one-way ANOVA, Dunnett's multiple-comparisons test). **I-J.** The protein expression level of PDPN in normoxic and hypoxic conditions in NU02068 neurospheres (unpaired two-tailed Student's t tests). **K.** BLI analysis demonstrates direct cell-free binding of PDPN to CLEC-2, with kinetic binding ( $K_{off}/K_{on}$ ) and equilibrium affinity ( $K_D$ ) derived from global kinetic fitting. **L-M.** Representative PLA images and quantification of PLA puncta in co-cultures of human PBMC-derived MDMs and patient-derived neurospheres under normoxia or hypoxia (Scale bar, 25  $\mu$ m) (unpaired two-tailed Student's t tests). **N-O.** Quantification of THP-1 cells (N) and MDMs (O) co-cultured with high-PDPN expression neurospheres (NU02068) or low-PDPN expression neurospheres (N08-74) (two-way ANOVA, Tukey's multiple-comparisons test). (\* $p < 0.05$ , \*\* $p < 0.01$ , \*\*\* $p < 0.001$ , \*\*\*\* $p < 0.0001$ )

### **Supplementary Figure 7. Suppressing PDPN reduces tumor progression *in vivo***

**A.** Representative 2D MRI images (top) and corresponding 3D tumor reconstructions (bottom) of RCAS/tv-a tumor-bearing mice at day 28 following intracranial injection of DF-1 cells carrying RCAS control or PDPN knockdown constructs (sh-PDPN-1 and sh-PDPN-2). Tumor boundaries are outlined (Scale bars, 1 mm). **B.** IF staining of mCherry (glioma cells), PDPN, p-STAT3 and CD133 in control and sh-PDPNs mice gliomas (Scale bar, 25  $\mu$ m). **C-D.** Representative flow cytometry images and quantification showing expression of PDPN in control and sh-PDPNs mouse gliomas (one-way ANOVA, Dunnett's multiple-comparisons test). **E-G.** Quantification of CD45<sup>+</sup>/CD11b<sup>+</sup> myeloid cells as a percentage of live cells (E), CD206 (F), and CD86 (G) expression within CD45<sup>+</sup> myeloid cells (one-way ANOVA, Dunnett's multiple-comparisons test). **H-I.** Representative flow cytometry plots and quantification of CD45<sup>+</sup>/CD11b<sup>+</sup> myeloid cells as a percentage of live cells across Control, sh-PDPN, BMT-Clec5a<sup>-/-</sup>, and sh-PDPN + BMT-Clec5a<sup>-/-</sup> groups (one-way ANOVA, Tukey's multiple-comparisons test). **J-K.** Representative flow cytometry images and quantification showing expression of PDPN among CD45<sup>-</sup>/CD11b<sup>-</sup> cells across indicated groups (one-way ANOVA, Tukey's multiple-comparisons test). **L-O.** Quantification of IBA1<sup>+</sup> cells as a percentage of total (DAPI) cells (L), CD163<sup>+</sup> cells as a percentage of IBA1<sup>+</sup> myeloid cells (M). CD8<sup>+</sup> cells as a percentage of total cells (N), and PD-1<sup>+</sup> cells as a percentage of CD8<sup>+</sup> T cells (O) in IF images across indicated groups (Control, sh-

PDPN, BMT-Clec5a<sup>-/-</sup>, sh-PDPN + BMT-Clec5a<sup>-/-</sup>, R406, and sh-PDPN + R406) (one-way ANOVA, Tukey's multiple-comparisons test). **P.** Quantification of CD8<sup>+</sup> cells in CD3<sup>+</sup> T cells across groups (one-way ANOVA, Tukey's multiple-comparisons test). **Q.** Representative multiplex IF images of mouse brain tumors showing IBA1, CD8 and PD-1 in control, sh-PDPN, BMT-Clec5a<sup>-/-</sup> and shPDPN + BMT-Clec5a<sup>-/-</sup> groups. (\**p* < 0.05, \*\**p* < 0.01, \*\*\**p* < 0.001, \*\*\*\**p* < 0.0001)

### **Supplementary Figure 8. CLEC5A promotes TAM-IM polarization and immunosuppressive TME through Syk-JAK-STAT3**

**A.** GSEA showing *CLEC5A*-related genes are highly enriched in JAK-STAT signaling pathway using TCGA dataset (NES = 2.680, *p*.adj = 0.005). **B-C.** Chord diagram showing relationship between *CLEC5A* and *PDPN*, Syk signaling molecules (*Syk*, *STAT3*), as well as immunosuppressive-related genes (*MRC1*, *MSR1* and *CD274*) using TCGA and CGGA GBM databases. **D.** Histogram depicting the proportion of p-Syk<sup>+</sup>/IBA1<sup>+</sup> cells relative to IBA1<sup>+</sup> cells across three distinct areas: peri-necrotic areas, distal necrotic zones in necrotic tumors, and in non-necrotic gliomas by IF staining shown in Fig. 6B (one-way ANOVA, Dunnett's multiple-comparisons test). **E.** Representative images showing PDPN, p-Syk, IBA1, and HIF-1 $\alpha$  expression across the indicated groups (Scale bar, 50  $\mu$ m). **F.** Quantification of p-Syk<sup>+</sup> cells as a percentage of IBA1<sup>+</sup> myeloid cells in IF images across indicated groups (Control, sh-PDPN, BMT-Clec5a<sup>-/-</sup>, sh-PDPN + BMT-Clec5a<sup>-/-</sup>, R406, and sh-PDPN + R406) (one-way ANOVA, Tukey's multiple-comparisons test). **G.** Schematic diagram of *in vivo* experimental design using the RCAS/tv-a mouse model to evaluate the therapeutic effects of Bay (5, 10, or 25 mg/kg/day) and R406 (5, or 10 mg/kg/day). **H.** Histogram illustrating changes in maximum tumor diameter as observed in MRI images at days 28 and 35 following glioma induction. **I.** IF staining of mCherry (glioma cell), PDPN, p-STAT3 and CD133 in RCAS/tv-a mouse tissue sections (Scale bar, 25  $\mu$ m). **J.** Histogram showing the proportion of CD163 expression in IBA1<sup>+</sup> myeloid cells in control and R406 treated mice (unpaired two-tailed Student's *t* tests). **K.** IF staining of IBA1 (immune cell), p-Syk and CD163 in RCAS/tv-a mouse tissue sections (Scale bar, 25  $\mu$ m). **L-M.** Histogram showing the proportion of CD45<sup>+</sup>/CD11b<sup>+</sup> cells among live cells (L) and CD206<sup>+</sup> cells among the CD45<sup>+</sup> population (M) in control and R406 treated mice through flow cytometry (unpaired two-tailed Student's *t* tests). (\**p* < 0.05, \*\**p* < 0.01, \*\*\**p* < 0.001, \*\*\*\**p* < 0.0001)

## Supplementary Figure 9. PDPN knockdown combined with Syk inhibition suppresses tumor progression and reprograms the immunosuppressive TME

**A-B.** Representative flow cytometry plots and quantification of CD45<sup>+</sup>/CD11b<sup>+</sup> myeloid cells in mouse brain tumors across indicated groups (Control, sh-PDPN, R406, and sh-PDPN + R406) (one-way ANOVA, Tukey's multiple-comparisons test). **C-D.** Representative flow cytometry plots and quantification of PDPN<sup>+</sup> cells among CD45<sup>-</sup>/CD11b<sup>-</sup> in mouse brain tumors across indicated groups (one-way ANOVA, Tukey's multiple-comparisons test). **E.** Representative IF images showing PDPN, p-Syk, IBA1, and HIF-1 $\alpha$  expression in tumor sections across groups (Scale bar, 50  $\mu$ m). **F.** Quantification of CD8<sup>+</sup> cells in CD3<sup>+</sup> T cells across groups (one-way ANOVA, Tukey's multiple-comparisons test). **G.** Representative IF images showing IBA1, CD8 and PD-1 expression across treatment groups (Scale bar, 50  $\mu$ m). **H-K.** Kaplan–Meier survival analyses stratified by sex (male vs female) in tumor-bearing mice under Control (H), PDPN knockdown (sh-PDPN) (I), Clec5a-deficient bone marrow transplantation (BMT-Clec5a<sup>-/-</sup>) (J), and Syk inhibitor (R406) treatment (K) conditions. Group sizes are indicated in each panel. **L.** Dose-response curves of patient-derived GBM neurospheres treated with Syk inhibitor R406 through CCK-8 assay. **M.** Flow cytometry-based quantification of myeloid cell origin within CD45<sup>+</sup>CD11b<sup>+</sup> tumor-infiltrating cells using CD49d and P2RY12 to distinguish monocyte-derived macrophages (mo-TAMs) and microglia. The majority of tumor-associated myeloid cells are CD49d<sup>+</sup> mo-TAMs (unpaired two-tailed Student's t tests). (\* $p$  < 0.05, \*\* $p$  < 0.01, \*\*\* $p$  < 0.001, \*\*\*\* $p$  < 0.0001)

## Supplementary Tables

### Supplementary Table 1

#### Survival analysis of common genes highly associated with *CD163*

| Common genes    | <i>p</i> value | HR               | 1-year AUC | 2-year AUC |
|-----------------|----------------|------------------|------------|------------|
| <i>CD163</i>    |                |                  | 0.645      | 0.605      |
| <i>CLEC5A</i>   | 1.16E-06       | 0.63 (0.52-0.76) | 0.685      | 0.621      |
| <i>CTSB</i>     | 0.0003         | 0.71 (0.59-0.86) | 0.729      | 0.598      |
| <i>C1R</i>      | 0.0005         | 0.72 (0.59-0.86) | 0.646      | 0.592      |
| <i>FCGR2B</i>   | 0.0006         | 0.72 (0.60-0.87) | 0.627      | 0.64       |
| <i>C1S</i>      | 0.0007         | 0.72 (0.60-0.87) | 0.631      | 0.569      |
| <i>IFI30</i>    | 0.0008         | 0.73 (0.60-0.88) | 0.664      | 0.515      |
| <i>F13A1</i>    | 0.0008         | 0.73 (0.60-0.88) | 0.607      | 0.551      |
| <i>CFI</i>      | 0.0018         | 0.74 (0.62-0.90) | 0.644      | 0.627      |
| <i>ALOX5AP</i>  | 0.0026         | 0.75 (0.62-0.91) | 0.636      | 0.534      |
| <i>C5AR1</i>    | 0.0028         | 0.75 (0.62-0.91) | 0.672      | 0.568      |
| <i>FCGR2A</i>   | 0.003          | 0.75 (0.62-0.91) | 0.634      | 0.57       |
| <i>THBD</i>     | 0.0043         | 0.76 (0.63-0.92) | 0.659      | 0.597      |
| <i>CSTA</i>     | 0.0058         | 0.77 (0.64-0.93) | 0.626      | 0.629      |
| <i>TREM1</i>    | 0.0063         | 0.77 (0.64-0.93) | 0.656      | 0.618      |
| <i>SIGLEC7</i>  | 0.0086         | 0.78 (0.65-0.94) | 0.649      | 0.527      |
| <i>RNASE2</i>   | 0.0142         | 0.79 (0.66-0.95) | 0.635      | 0.567      |
| <i>LHFPL2</i>   | 0.0154         | 0.79 (0.66-0.96) | 0.611      | 0.489      |
| <i>TNFRSF1B</i> | 0.0175         | 0.80 (0.66-0.96) | 0.635      | 0.543      |
| <i>CD14</i>     | 0.0186         | 0.80 (0.66-0.96) | 0.661      | 0.56       |
| <i>LAIR1</i>    | 0.0248         | 0.81 (0.67-0.97) | 0.655      | 0.551      |
| <i>HMOX1</i>    | 0.0256         | 0.81 (0.67-0.97) | 0.673      | 0.511      |
| <i>NCF4</i>     | 0.0258         | 0.81 (0.67-0.97) | 0.627      | 0.535      |
| <i>SLC11A1</i>  | 0.0265         | 0.81 (0.67-0.98) | 0.699      | 0.517      |
| <i>STAB1</i>    | 0.0282         | 0.81 (0.67-0.98) | 0.638      | 0.535      |
| <i>LILRB3</i>   | 0.0294         | 0.81 (0.67-0.98) | 0.713      | 0.58       |

## Supplementary Table 2

**Baseline characteristics table of glioma patients in TCGA database**

| Characteristic                 | Low expression of <i>CLEC5A</i> | High expression of <i>CLEC5A</i> | <i>p</i> |
|--------------------------------|---------------------------------|----------------------------------|----------|
| n                              | 348                             | 348                              |          |
| WHO grade, n (%)               |                                 |                                  | < 0.001  |
| G2                             | 163 (25.7%)                     | 61 (9.6%)                        |          |
| G3                             | 135 (21.3%)                     | 108 (17%)                        |          |
| G4                             | 5 (0.8%)                        | 163 (25.7%)                      |          |
| IDH status, n (%)              |                                 |                                  | < 0.001  |
| WT                             | 22 (3.2%)                       | 224 (32.7%)                      |          |
| Mut                            | 324 (47.2%)                     | 116 (16.9%)                      |          |
| 1p/19q codeletion, n (%)       |                                 |                                  | < 0.001  |
| codel                          | 155 (22.5%)                     | 16 (2.3%)                        |          |
| non-codel                      | 193 (28%)                       | 325 (47.2%)                      |          |
| Primary therapy outcome, n (%) |                                 |                                  | < 0.001  |
| PD                             | 47 (10.2%)                      | 65 (14.1%)                       |          |
| SD                             | 104 (22.5%)                     | 43 (9.3%)                        |          |
| PR                             | 47 (10.2%)                      | 17 (3.7%)                        |          |
| CR                             | 104 (22.5%)                     | 35 (7.6%)                        |          |
| Gender, n (%)                  |                                 |                                  | 1.000    |
| Female                         | 149 (21.4%)                     | 149 (21.4%)                      |          |
| Male                           | 199 (28.6%)                     | 199 (28.6%)                      |          |
| Age, n (%)                     |                                 |                                  | < 0.001  |
| ≤60                            | 315 (45.3%)                     | 238 (34.2%)                      |          |
| >60                            | 33 (4.7%)                       | 110 (15.8%)                      |          |
| Histological type, n (%)       |                                 |                                  | < 0.001  |
| Astrocytoma                    | 98 (14.1%)                      | 97 (13.9%)                       |          |
| Glioblastoma                   | 5 (0.7%)                        | 163 (23.4%)                      |          |
| Oligoastrocytoma               | 90 (12.9%)                      | 44 (6.3%)                        |          |
| Oligodendroglioma              | 155 (22.3%)                     | 44 (6.3%)                        |          |
| OS event, n (%)                |                                 |                                  | < 0.001  |
| Alive                          | 284 (40.8%)                     | 140 (20.1%)                      |          |
| Dead                           | 64 (9.2%)                       | 208 (29.9%)                      |          |
| Race, n (%)                    |                                 |                                  | 0.297    |
| Asian                          | 5 (0.7%)                        | 8 (1.2%)                         |          |
| Black or African American      | 13 (1.9%)                       | 20 (2.9%)                        |          |
| White                          | 325 (47.6%)                     | 312 (45.7%)                      |          |
| DSS event, n (%)               |                                 |                                  | < 0.001  |
| Alive                          | 288 (42.7%)                     | 143 (21.2%)                      |          |
| Dead                           | 56 (8.3%)                       | 188 (27.9%)                      |          |
| PFI event, n (%)               |                                 |                                  | < 0.001  |
| Alive                          | 237 (34.1%)                     | 113 (16.2%)                      |          |
| Dead                           | 111 (15.9%)                     | 235 (33.8%)                      |          |
| Age, mean ± SD                 | 41.82 ± 13.32                   | 51.53 ± 15.34                    | < 0.001  |

### Supplementary Table 3

#### Cytokine antibody microarray

| ID (pg/ml) | Control  | Positive Control | sh-NC    | sh-CLEC5A | Empty Vector | OE-CLEC5A |
|------------|----------|------------------|----------|-----------|--------------|-----------|
| IL-1a      | 138      | 96.25            | 317.25   | 129       | 249.5        | 201.5     |
| IL-1b      | 3675.13  | 4192.63          | 3594.88  | 1608.5    | 3730.25      | 4426.88   |
| IL-2       | 932.38   | 2031             | 1016     | 651.88    | 663          | 1440.38   |
| IL-4       | 113.5    | 145              | 128.75   | 0         | 124.25       | 162.25    |
| IL-5       | 1166.75  | 2611.5           | 1065.13  | 947.38    | 942.63       | 1973.75   |
| IL-6       | 633.63   | 1596.88          | 662.25   | 342.63    | 637.25       | 1234.25   |
| IL-8       | 27474.75 | 53143.75         | 47229.75 | 23213.25  | 27729.25     | 75306.88  |
| IL-10      | 4765.13  | 8638.75          | 4864.25  | 2534.75   | 4762.13      | 9917      |
| IL-12p70   | 0        | 0                | 94.38    | 0         | 0            | 113.75    |
| IL-13      | 1660     | 4104             | 1625.75  | 1018.25   | 1287.25      | 2024      |
| GM-CSF     | 221      | 370.75           | 196.38   | 99        | 214.38       | 249.75    |
| GRO        | 20023.88 | 22783.63         | 20330.38 | 10493.25  | 20484.25     | 19017     |
| IFNg       | 1183.88  | 2119.38          | 1163.25  | 896.75    | 1026         | 1563.88   |
| MCP-1      | 21029.75 | 21086.75         | 20884.75 | 15806.63  | 12634.88     | 19536     |
| MIP-1a     | 142340.8 | 143224.9         | 141177   | 138468    | 130039.4     | 142316    |
| MIP-1b     | 82885.38 | 82075.38         | 88608.5  | 73786.88  | 67980        | 86523.5   |
| MMP-9      | 19130.5  | 11798            | 19436.63 | 12455.88  | 10023.38     | 14382.38  |
| RANTES     | 155180.1 | 143262.4         | 161735.8 | 143325.8  | 147693       | 147578.8  |
| TNFa       | 899.75   | 2053.25          | 888      | 560.63    | 891.63       | 1700.25   |
| VEGF       | 12       | 0                | 431.25   | 107       | 215.25       | 89.25     |

## Supplementary Table 4

### Antibody table

| Antibody       | Source  | Company            | Cat. #       | Application | Dilution |
|----------------|---------|--------------------|--------------|-------------|----------|
| CAIX           | mouse   | Santa Cruz Biotech | sc-365900    | IF          | 1:100    |
| CD133          | mouse   | DSHB (Iowa)        | HB#7 sup     | IF          | 1:100    |
| CD163          | rabbit  | Abcam              | ab182422     | WB          | 1:1000   |
| CD163          | rat     | Abcam              | ab289979     | IF          | 1:200    |
| CD163          | mouse   | Abcam              | ab156769     | IF          | 1:100    |
| CD163          | mouse   | GeneTex            | GTX54458     | IF          | 1:250    |
| CD163          | rat     | Invitrogen         | 14-1631-82   | IF          | 1:200    |
| CD206          | rabbit  | ABclonal           | A11192       | WB          | 1:1000   |
| CD8 alpha      | rabbit  | Abcam              | ab316778     | IF          | 1:200    |
| CLEC5A         | rabbit  | Abcam              | ab203200     | IHC         | 1:100    |
| CLEC5A         | rabbit  | Abcam              | ab184156     | IF          | 1:100    |
|                |         |                    |              | WB          | 1:1000   |
| CLEC5A         | rabbit  | Abcam              | ab314870     | IF          | 1:100    |
| CLEC5A         | rabbit  | Bioss              | bs-2663R     | PLA         | 1:200    |
| FLAG DYKDDDDK  | rabbit  | CST                | 14793        | co-IP       | 1:50     |
| HIF-1 $\alpha$ | mouse   | CST                | 79233S       | IF          | 1:100    |
| IBA1           | chicken | Aves Labs          | IBA1-0020    | IF          | 1:400    |
| Jak2           | rabbit  | CST                | 3230S        | WB          | 1:1000   |
| mCherry        | chicken | Aves Labs          | mcherry-0100 | IF          | 1:400    |
| Normal IgG     | rabbit  | CST                | 2729S        | co-IP       | 1:200    |
| PD-1           | mouse   | Abcam              | ab52587      | IF          | 1:100    |
| PD-1           | rat     | Abcam              | ab309360     | IF          | 1:100    |
| PD-L1          | rabbit  | CST                | 13684S       | WB          | 1:1000   |
| PDPN           | rabbit  | CST                | 9047S        | co-IP       | 1:200    |
| PDPN           | mouse   | Santa Cruz Biotech | sc-59347     | IF          | 1:100    |
|                |         |                    |              | PLA         | 1:200    |
| PDPN           | rat     | Invitrogen         | MA5-16267    | IF          | 1:200    |
| PDPN           | rat     | Invitrogen         | MA5-16270    | IF          | 1:100    |
| phospho-Jak2   | rabbit  | CST                | 3771S        | WB          | 1:1000   |
| phospho-STAT3  | rabbit  | CST                | 9145S        | IF          | 1:100    |
|                |         |                    |              | WB          | 1:1000   |
| phospho-Syk    | rabbit  | CST                | 2710S        | IF          | 1:100    |
|                |         |                    |              | WB          | 1:1000   |
| STAT3          | mouse   | CST                | 9139S        | WB          | 1:1000   |
| Syk            | rabbit  | CST                | 13198S       | WB          | 1:1000   |
| $\beta$ -actin | mouse   | ZSGB-Bio           | TA-09        | WB          | 1:2000   |

## Supplementary Table 5

### Flow cytometry antibody table

| Antibody      | Species                   | Fluorophore      | Company         | Cat. #      | Dilution |
|---------------|---------------------------|------------------|-----------------|-------------|----------|
| CD11b         | rat anti-human/mouse      | PE-Cy7           | BD Biosciences  | 552850      | 1:50     |
| CD163         | mouse anti-human          | BV421            | BioLegend       | 333612      | 1:20     |
| CD206         | mouse anti-human          | APC              | BioLegend       | 321110      | 1:20     |
| CD206         | rat anti-mouse            | APC              | BioLegend       | 141708      | 1:25     |
| CD279 (PD-1)  | rat anti-mouse            | PE/Dazzle 594    | BioLegend       | 135228      | 1:50     |
| CD3           | rat anti-mouse            | PE/Fire 810      | BioLegend       | 100277      | 1:20     |
| CD45          | rat anti-mouse            | PerCP/Cyanine5.5 | BioLegend       | 103132      | 1:20     |
| CD45          | mouse anti-human          | PerCP/Cyanine5.5 | BioLegend       | 368503      | 1:20     |
| CD49d         | rat anti-mouse            | FITC             | BioLegend       | 103606      | 1:50     |
| CD8a          | rat anti-mouse            | AF488            | BioLegend       | 100723      | 1:50     |
| CD86          | mouse anti-human          | BV605            | BioLegend       | 374214      | 1:20     |
| CD86          | rat anti-mouse            | BV605            | BioLegend       | 105125      | 1:25     |
| CLEC5A        | mouse anti-human          | PE               | BioLegend       | 371705      | 1:50     |
| CLEC5A        | human anti-mouse          | PE               | Miltenyi Biotec | 130-126-308 | 1:50     |
| Granzyme B    | rat anti-human/mouse      | AF700            | BioLegend       | 396426      | 1:20     |
| IFN- $\gamma$ | rat anti-mouse            | BV605            | BioLegend       | 505839      | 1:25     |
| P2RY12        | rat anti-mouse            | APC/Cyanine7     | BioLegend       | 848024      | 1:40     |
| PDPN          | syrian hamster anti-mouse | FITC             | BioLegend       | 127416      | 1:50     |
| PDPN          | rat anti-human/mouse      | PE-Dazzle 594    | BioLegend       | 337028      | 1:20     |
| TCF-7         | mouse anti-human/mouse    | BV421            | BD Biosciences  | 566692      | 1:20     |
| TOX           | human anti-human/mouse    | PE               | Miltenyi Biotec | 130-120-716 | 1:50     |

## Supplementary Table 6

### qPCR primer sequences

| Targets                        | Primer sequences                                                              |
|--------------------------------|-------------------------------------------------------------------------------|
| <i>CLEC5A</i>                  | Forward: 5'-GTGGCGTTGGATCAACAACT-3'<br>Reverse: 5'-CTTCTCACAGATCCTGCGGT-3'    |
| <i>CD163</i>                   | Forward: 5'-GAAGACAGAGACAGCGGCTT-3'<br>Reverse: 5'-ATCTTAAAGGCTGAACTCACTGG-3' |
| <i>MRC1</i>                    | Forward: 5'-GGGGAAAGGTTACCCTGGTG-3'<br>Reverse: 5'-TCAAGGAAGGGTCGGATCGT-3'    |
| <i>IL-10</i>                   | Forward: 5'-TGAAAACAAGAGCAAGGCCG-3'<br>Reverse: 5'-GCCACCCTGATGTCTCAGTT-3'    |
| <i>CD86</i>                    | Forward: 5'-AGGCAACAATGAGCAGACCA-3'<br>Reverse: 5'-ACTATGGCTTGTTGGGTGGG-3'    |
| <i>IL-12p35</i>                | Forward: 5'-CAGAAGGCCAGACAACTCT-3'<br>Reverse: 5'-GCCAGGCAACTCCCATTAGTTA-3'   |
| <i>MSR1</i>                    | Forward: 5'-CGTTGGACAGGTCGTCTGTA-3'<br>Reverse: 5'-CTTGTCCCCCATTGCCGAAT-3'    |
| <i>iNOS</i>                    | Forward: 5'-ACCTACCAACTGACGGGAGA-3'<br>Reverse: 5'-ATGGCCGACCTGATGTTGC-3'     |
| <i>TNF-<math>\alpha</math></i> | Forward: 5'-CCTCTCTCTAATCAGCCCTCTG-3'<br>Reverse: 5'-GAGGACCTGGGAGTAGATGAG-3' |
| <i>CCL5</i>                    | Forward: 5'-CCAGCAGTCGTCTTTGTCAC-3'<br>Reverse: 5'-CTCTGGGTTGGCACACACTT-3'    |
| <i>CD16</i>                    | Forward: 5'-GGCTGGGGAAAGGCTGTTTA-3'<br>Reverse: 5'-GGGAGATCTTCAGTCCGCAT-3'    |
| <i>TGF-<math>\beta</math></i>  | Forward: 5'-GGCCAGATCCTGTCCAAGC-3'<br>Reverse: 5'-GTGGGTTTCCACCATTAGCAC-3'    |
| <i>CCL2</i>                    | Forward: 5'-CAGCCAGATGCAATCAATGCC-3'<br>Reverse: 5'-TGGAATCCTGAACCCACTTCT-3'  |

## Supplementary Methods

### 1. Bioinformatics analysis

Kaplan-Meier survival analysis was used to demonstrate the relationship between *CLEC5A* expression and overall survival among glioma patients. We further analyzed genes highly correlated with *CD163* in three GBM datasets using Pearson correlation coefficient analysis. Among these genes, the correlation coefficient of TCGA GBM array dataset and TCGA GBM RNAseq dataset was selected [-0.6–0.6], as was the correlation coefficient of CGGA GBM RNAseq [-0.7–0.7]. Gene Set Enrichment Analysis (GSEA) were performed using the “clusterProfiler” package.

### 2. Time-dependent ROC curve and survival analysis

Time-dependent ROC curves were used to assess the predictive power of molecular expression to forecast patient outcome in relation to time. We analyzed *CLEC5A* expression using time-dependent ROC curves to analyze of 1- and 2-year survival outcomes. Kaplan-Meier survival analysis indicating the influence of the expression of *CLEC5A* and *CD163* on overall survival time and median value was used as the cutoff to define high and low expression group. Survival analyses were conducted using log-rank (Mantel–Cox) test in GraphPad Prism 10 software.

### 3. Sample collection, tissue microarray (TMA) and IHC

At the time of tumor banking, glioma tissues were categorized into three regions: tumor center (high cell density, often with necrosis), surrounding tumor (moderate cell density) or tumor border (brain-glioma interface), then paraffin-embedded for IF and IHC analysis. Our TMA contained tissue samples from 55 patients, including 2 non-tumor samples (temporal lobe epilepsy and cortical dysplasia), 1 WHO grade 1 glioma, 12 WHO grade 2 gliomas, 12 WHO grade 3 gliomas and 28 WHO grade 4 gliomas. Each patient sample included tumor center, surrounding tumor and tumor border components. TMA, human tissues and mouse brain tissues were incubated with primary antibody for IHC staining overnight. IHC target proteins were detected using goat anti-rabbit IgG two-step detection kit (PV-9000, ZSGB-Bio, China), then nuclei were counterstained with Mayer’s hematoxylin solution (G1080, Solarbio, China). IHC and H&E images were acquired with a VANOX microscope (Olympus, Japan) and IHC intensity score was graded as 0 (negative), 1 (weakly positive, light brown), 2 (moderately positive, brown), or 3

(strongly positive, dark brown). IHC quantity score was graded as 0 (negative), 1 ( $\leq 25\%$ ), 2 (26% - 50%), 3 (51% - 75%), or 4 ( $> 75\%$ ). The total IHC score combines the intensity and quantity scores.

#### **4. Cell culture**

Primary human GBM cell lines (N08-74, NU01478, NU01485, NU01805, NU01853, NU02068, NU01594, NU01738 and NU03438) were isolated from human GBM tissue obtained through Emory University and the Nervous System Tumor Bank (NSTB) at Northwestern University, and cultured in Neurobasal medium (21103049, Gibco, USA) supplemented with B-27 supplement (10 ml; 17504044, Gibco, USA), recombinant human bFGF (20 ng/ml; 02634, Stemcell Technologies, Canada), recombinant human EGF (20 ng/ml; 02633, Stemcell Technologies, Canada), heparin (5 ml; 07980, Stemcell Technologies, Canada), GlutaMAX (5 ml; 35050061, Gibco, USA) and Antibiotic-Antimycotic (5 ml; 15240062, Gibco, USA). DF-1 chicken embryonic fibroblasts were generously donated by the laboratory of Oren Becher (Mount Sinai, NY, USA). DF-1 cells were also cultured in DMEM (11965092, Gibco, USA) supplemented with 10% FBS (26140079, Gibco, USA) and Penicillin-Streptomycin (15140122, Gibco, USA). Human monocyte cell line THP-1 was purchased from ATCC (USA), and human peripheral blood monocytes were purchased from Stemcell Technologies (200-0167, Canada). Both were cultured in RPMI 1640 medium (61870036, Gibco, USA) supplemented with 10% FBS and Penicillin-Streptomycin. THP-1 cells were activated using phorbol 12-myristate 13-acetate (PMA, 100 ng/ml, P1585, Millipore Sigma, USA) for 48 hours and polarized towards TAM-IM phenotype using recombinant human IL-4 (25 ng/ml, 200-04, PeproTech, USA) and recombinant human IL-13 (25 ng/ml, 200-13, PeproTech, USA) for another 48 hours. Human peripheral blood monocytes were activated using macrophage colony-stimulating factor (M-CSF, 50 ng/ml, M6518, Millipore Sigma, USA) for 5 days. All cells were incubated in 21% O<sub>2</sub> (Normoxic) or 1% O<sub>2</sub> (Hypoxic), 5% CO<sub>2</sub> at 37°C.

#### **5. Cytokine microarray**

THP-1 cells were seeded into the lower chamber of 24-well plate and activated with PMA. After recovery in FBS-free medium, an equivalent number of glioma cells (U87MG) were seeded atop a 3  $\mu$ m pore membrane in the upper chamber. After 24 hours, co-culture media was collected and cytokines were identified using an antibody microarray kit (QAH-CYT-1, RayBiotech, USA)

according to the manufacturer's protocol (<https://doc.raybiotech.com/pdf/Manual/QAH-CYT-1.pdf>).

## **6. qPCR assay**

Total RNA was extracted using TRIzol (15596018, Invitrogen, USA). 5 µg RNA per sample was reverse transcribed to generate a cDNA library using GoScript Reverse Transcription System (A5001, Promega, USA) according to the manufacturer's instructions. Then, qPCR was performed for 40 cycles to obtain Ct values using GoTaq qPCR Master Mix (A6001, Promega, USA) based on the manufacturer's protocol. Primer sequences are listed in Table S6.

## **7. Lentiviral construction and transfection**

We constructed shRNA-CLEC5A sequences (sh-CLEC5A-1, 5'-caTTGGCCTAACAAAGACATT-3'; sh-CLEC5A-2, 5'-gtTGTTGGAATGACCTTATTT-3') and a negative control shRNA sequence (sh-NC, 5'-TTCTCCGAACGTGTCACGT-3') using the GV493 vector purchased from GeneChem, China. We also generated a CLEC5A overexpression plasmid using GV492 vector with FLAG tag and an empty vector negative control (GeneChem, China). Lentiviral transfection of THP-1 cells was performed according to manufacturer's protocol, with subsequent selection using 2 µg/ml puromycin (A1113803, Gibco, USA).

## **8. CT-2A syngeneic orthotopic glioma model**

To validate findings in an independent immunocompetent model, a syngeneic CT-2A orthotopic glioma model was established in C57BL/6 mice. Bone marrow transplantation (BMT) was performed using wildtype or *Clec5a*<sup>-/-</sup> donor mice. Recipient mice were lethally irradiated prior to transplantation and allowed to reconstitute hematopoiesis before tumor implantation. CT-2A glioma cells (2 x 10<sup>4</sup> cells in 1 µl media) were stereotactically implanted into the brains of BMT recipients. Tumor progression was assessed by MRI and 3D volumetric reconstruction, and survival was monitored longitudinally.
